# Supplementary material for: Two adjacent NLR genes conferring quantitative resistance to clubroot disease in Arabidopsis are regulated by a stably inherited epiallelic variation
Source: PubMed Central journal article supplement — Plant Commun. 2024 Jan 23;5(5):100824. doi: 10.1016/j.xplc.2024.100824 (PMC11121752; doi:10.1016/j.xplc.2024.100824), 2024-01-23
Supplement: mmc1.pdf [file mmc1.pdf]

**Plant Communications, Volume 5**

**Supplemental information**

**Two adjacent NLR genes conferring quantitative resistance to clubroot disease in *Arabidopsis* are regulated by a stably inherited epiallelic variation**

**Antoine Gravot, Benjamin Liégard, Leandro Quadrana, Florian Veillet, Yoann Aigu, Tristan Bargain, Juliette Bénéjam, Christine Lariagon, Jocelyne Lemoine, Vincent Colot, Maria J. Manzanares-Dauleux, and Mélanie Jubault**

## Supplementary Figures

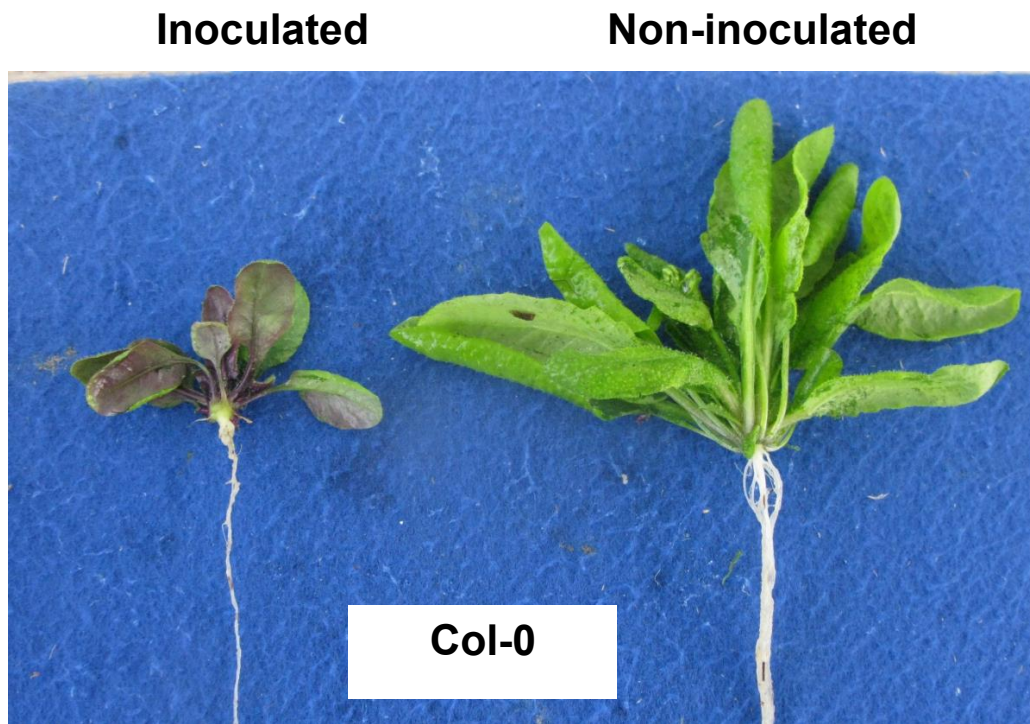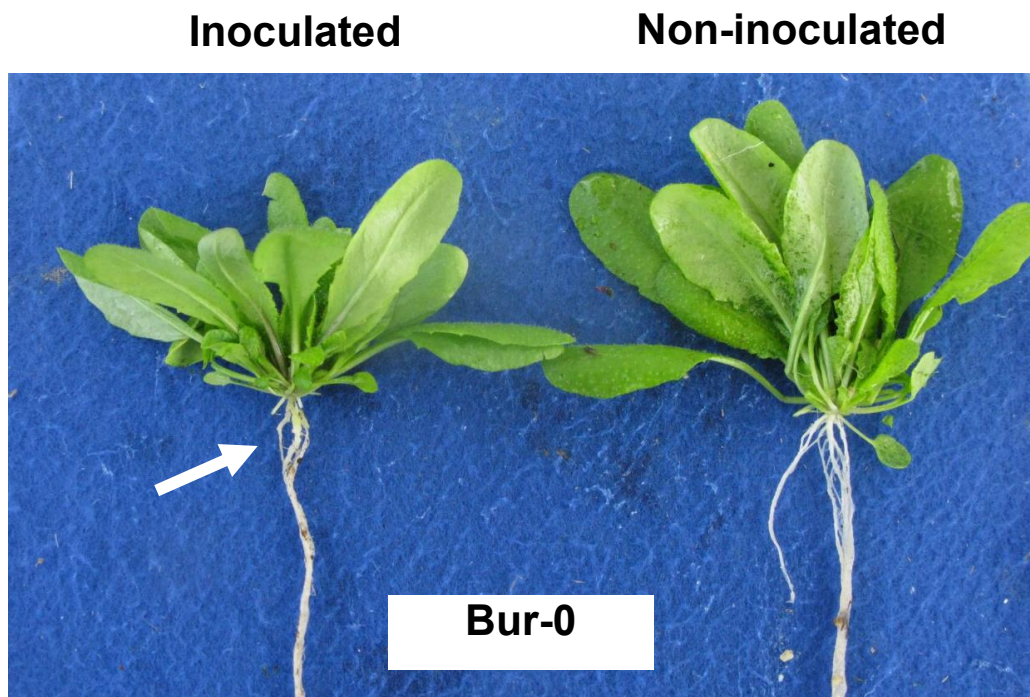

**Supplementary Figure S1 | Illustration of partial resistance to eH isolate in Bur-0, compared to the full susceptibility in Col-0.** Observations were done at 21 days post-inoculation. The white arrow indicates the presence of limited amount of galls in inoculated Bur-0. Plant individuals representative of standard observations made in our experimental conditions.

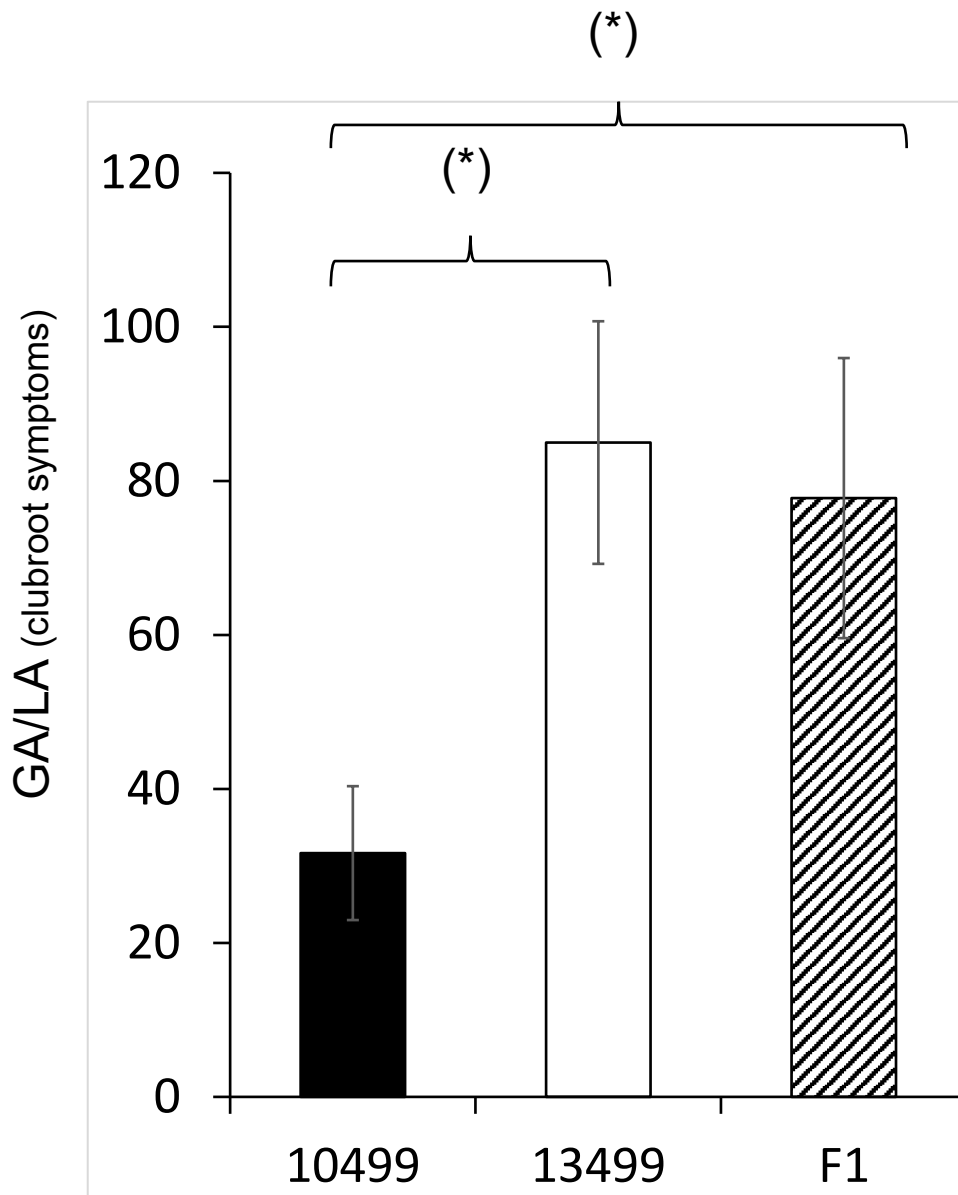

**Supplementary Figure S2 | Comparison of GA/LA disease index in the F1 progeny and in the parental lines 10499 and 13499.** GA/LA disease index is calculated through image analysis (details in the material and method part) from inoculated plants at 21 days post inoculation. Data are from 3 replicates (n=3). For each replicate, GA/LA disease index was calculated from 6 to 12 inoculated individual plants. Stars indicate statistical differences from the paired Student t-test ( $p=0.05$ ).

## Inoculated

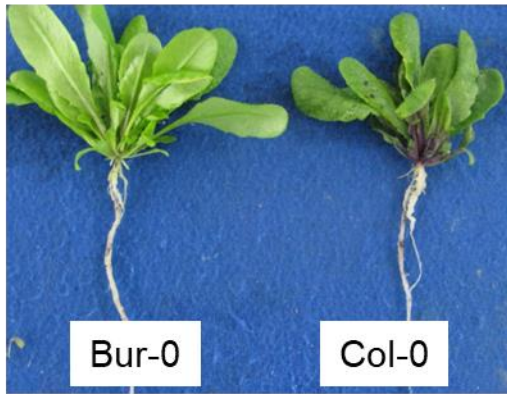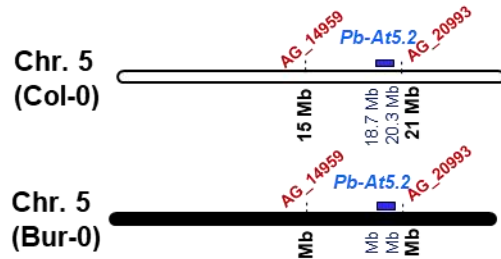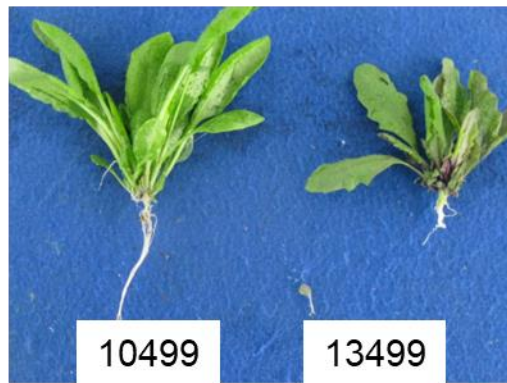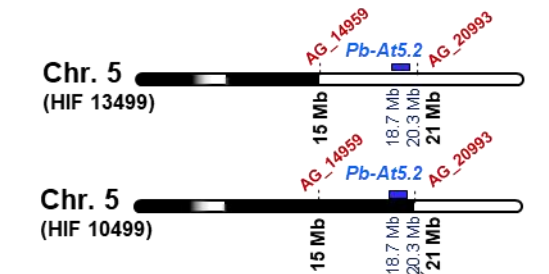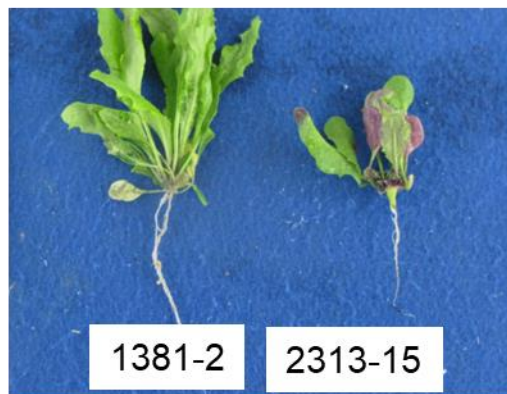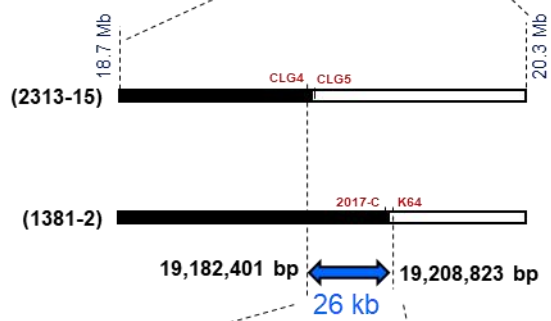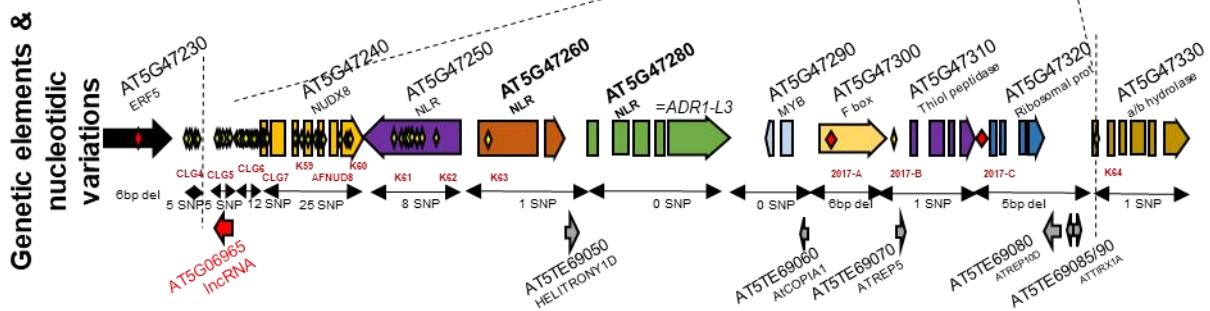

**Supplementary Figure S3 | Illustration of clubroot symptoms in a selection of genotypes used for the fine mapping.** Pictures of inoculated plants were taken at 21 days post inoculation. Genetic structure is indicated on the right side. Black=Bur-0 allele, white=Col-0 allele. Additional details in the legend of Figure 1.

**A**

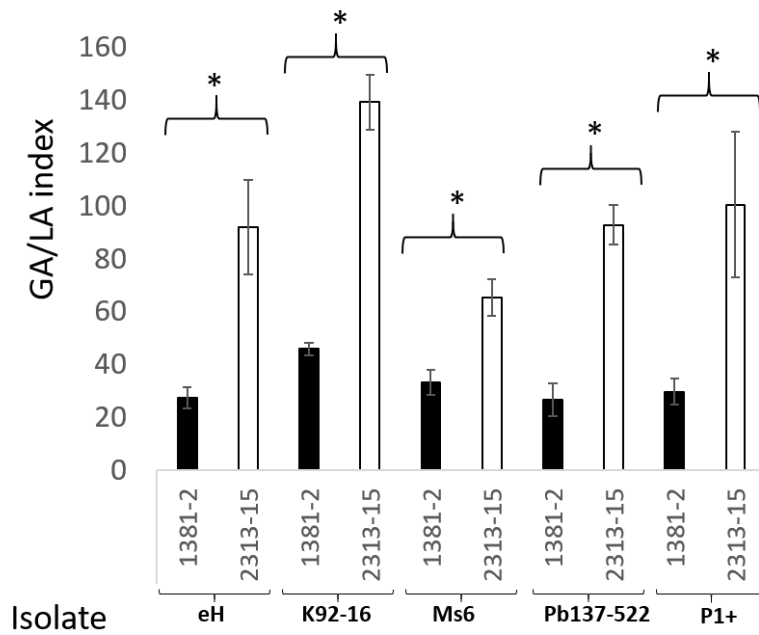

**B**

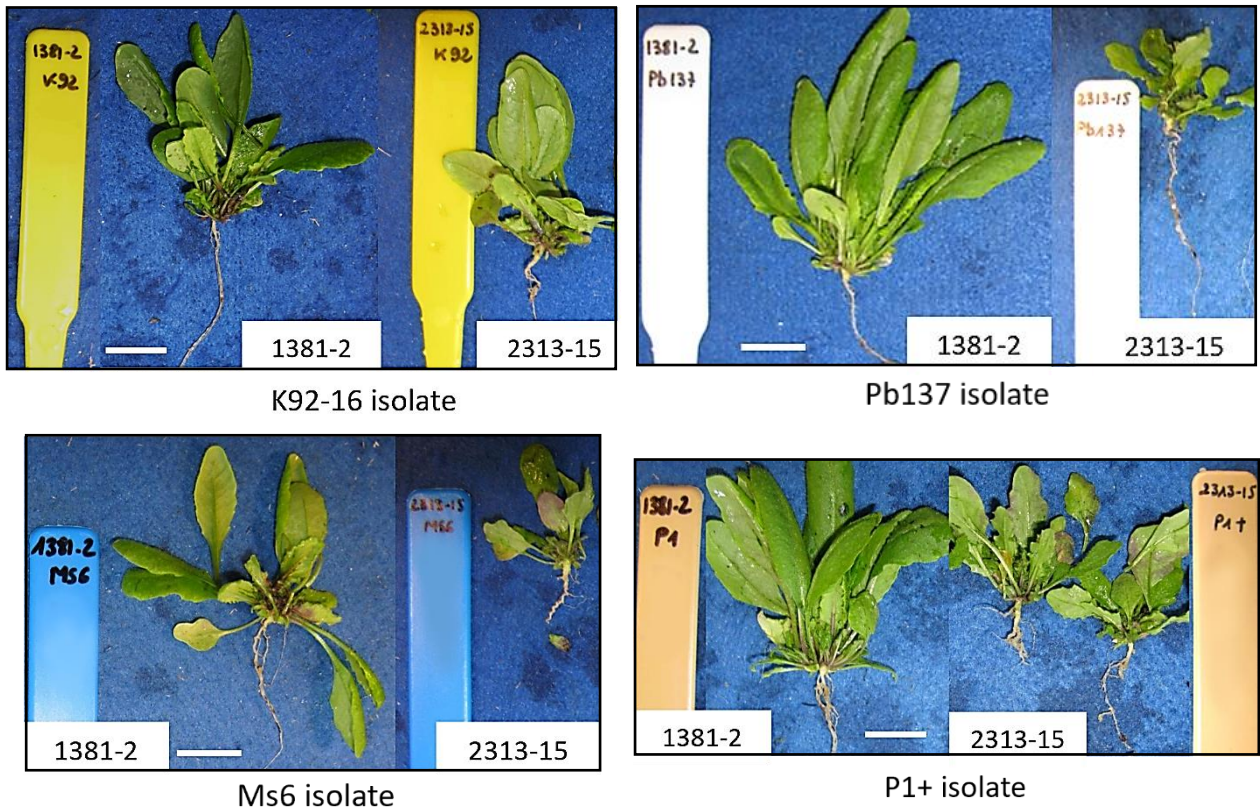

**Supplementary Figure S4 | Broad-spectrum resistance conferred by the Bur-0 allele of *Pb-At5.2*** **A** GA/LA disease index and **B** photos of RIL499-derived near-isogenic lines 1381-2 and 2313-15 challenged with a series of four European monospore *P. brassicae* isolates (eH, K92-16, Ms6 and Pb137-522), and with the field isolate P1+. This last isolate is representative of emerging European strains that are virulent on the variety ‘Mendel’ (a clubroot-resistant oilseed rape variety which has been used as a source of resistance for the creation of several modern clubroot-resistant varieties). Data are means of 4 independent replicates (n=4). For each replicate, GA/LA values are means of 6 to 12 individual plants. Error bars indicate standard errors. Statistically different values (from Student T-test) are indicated by stars. Bars, 1.6 cm

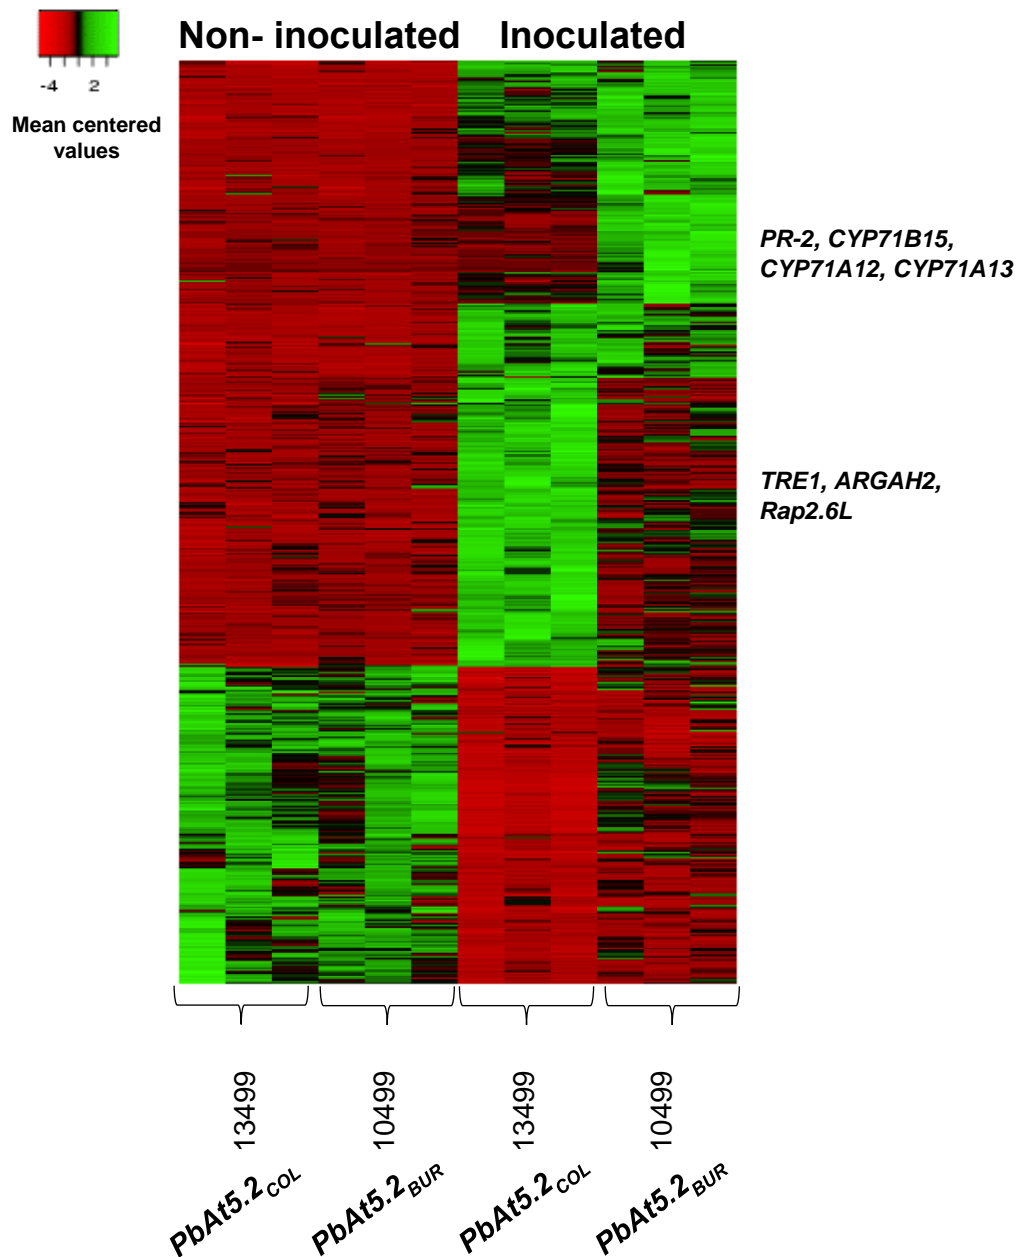

**Supplementary Figure S5 | Transcriptional regulations induced by isolate eH at 14 dpi in the recombinant HIF lines 10499 and 13499 harboring Bur-0 or Col-0 allele at *PbAt5.2*.** Data are mean-centered values of CPM (Counts Per Million). For each genotype, three columns are from three independent biological replicates. This set of 559 genes was selected as following: 1/Genes significantly induced ( $p$ -value $<0.05$  +  $\log(\text{FC})>2$  or  $<-2$ ) by eH isolate at 14 dpi in 10499 or 13499; 2/Mean gene expression $>1$ . 61 genes, including *PR-2*, *CYP71B15*, *CYP71A12* and *CYP71A13*, were induced at higher levels in 10499 ( $p$ -value $<0.05$ ). 58 genes, including *TRE1*, *ARGAH2* and *Rap2.6L* were induced at higher levels in 13499 ( $p$ -value $<0.05$ ).

| AT5G47260             | Bur-0 (WT)        | ttggaagaagaaccacaagagcgcgaagcagctgaatattggcagctctaaaggaaagagatttggcttactggagccatcacagggaattggattcaggaattggattcaggaattggattcctttt<br>TtpArgGluThrLysGluArgLysAlaAgluIleLeuAlaValLeuLysGluLysArgPheValLeuLeuLeuLeuaspolyIleGluInuGluLeuLeuaspolyIleGluValProPhe                       |
|-----------------------|-------------------|-------------------------------------------------------------------------------------------------------------------------------------------------------------------------------------------------------------------------------------------------------------------------------------|
|                       | 117-1             | ttggaagaagaaccacaagagcgcgaagcagctgaatattggcagctctaaaggaaagagatttggcttactggagccatcacagggaattggattcaggaattggattcaggaattggattcctttt<br>TtpArgGluThrLysGluArgLysAlaAgluIleLeuAlaValLeuLysGluLysArgPheValLeuLeuLeuLeuaspolyIleGluInuGluLeuLeuaspolyIleGluValProPhe                       |
| Bur-0<br>(Δ47260)     | 117-36            | ttggaagaagaaccacaagagcgcgaagcagctgaatattggcagctctaaaggaaagagatttggcttactggagccatcacagggaattggattcaggaattggattcaggaattggattcctttt<br>TtpArgGluThrLysGluArgLysAlaAgluIleLeuAlaValLeuLysGluLysArgPheValLeuLeuLeuLeuaspolyIleGluInuGluLeuLeuaspolyIleGluValProPhe / 102nt / TAG<br>STOP |
|                       | 85-7              | ttggaagaagaaccacaagagcgcgaagcagctgaatattggcagctctaaaggaaagagatttggcttactggagccatcacagggaattggattcaggaattggattcaggaattggattcctttt<br>TtpArgGluThrLysGluArgLysAlaAgluIleLeuAlaValLeuLysGluLysArgPheValLeuLeuLeuLeuaspolyIleGluInuGluLeuLeuaspolyIleGluValProPhe                       |
| AT5G47280             | Bur-0 (WT)        | Ggtctaccttggctctgaaagtccttggcgcctctcattcaaacgatcgacctgaaacataattgggcaattggcagggtttacaagggtttacaagctttgatgaacctcagagatcaagctttgct<br>GlyLeuProLeuSerLeuLysValLeuGlyAlaSerLeuAsnAspArgProGluThrTyrTrpAlaIleAlaValGluArgLeuSerArgGlyGluProValAspGluThrHisGluSerLysValPheAla            |
|                       | 21-20             | ggctctaccttggctctgaaagtccttggcgcctctcattcaaacgatcgacctgaaacataattgggcaattggcagggtttacaagggtttacaagctttgatgaacctcagagatcaagctttgct<br>GlyLeuProLeuSerLeuLysValLeuGlyAlaSerLeuAsnAspArgProGluThrTyrTrpAlaIleAlaValGluArgLeuSerArgGlyGluProValAspGluThrHisGluSerLysValPhe              |
| Bur-0<br>(Δ47280)     | 160-2             | ggctctaccttggctctgaaagtccttggcgcctctcattcaaacgatcgacctgaaacataattgggcaattggcagggtttacaagggtttacaagctttgatgaacctcagagatcaagctttgct<br>GlyLeuProLeuSerLeuLysValLeuGlyAlaSerLeuAsnAspArgProGluThrTyrTrpAlaIleAlaValGluArgLeuSerArgGlyGluProValAspGluThrHisGluSerLysValPhe              |
|                       | 163-16            | ggctctaccttggctctgaaagtccttggcgcctctcattcaaacgatcgacctgaaacataattgggcaattggcagggtttacaagggtttacaagctttgatgaacctcagagatcaagctttgct<br>GlyLeuProLeuSerLeuLysValLeuGlyAlaSerLeuAsnAspArgProGluThrTyrTrpAlaIleAlaValGluArgLeuSerArgGlyGluProValAspGluThrHisGluSerLysValPhe              |
| AT5G47260             | HIF 10499<br>(WT) | ttggaagaagaaccacaagagcgcgaagcagctgaatattggcagctctaaaggaaagagatttggcttactggagccatcacagggaattggattcaggaattggattcaggaattggattcctttt<br>TtpArgGluThrLysGluArgLysAlaAgluIleLeuAlaValLeuLysGluLysArgPheValLeuLeuLeuLeuaspolyIleGluInuGluLeuLeuaspolyIleGluValProPhe                       |
|                       | 95-14             | .....gaaccacaagagcgcgaagcagctgaatattggcagctctaaaggaaagagatttggcttactggagccatcacagggaattggattcaggaattggattcaggaattggattcctttt<br>GluThrLysGluArgLysAlaAgluIleLeuAlaValLeuLysGluLysArgPheValLeuLeuLeuLeuaspolyIleGluInuGluLeuLeuaspolyIleGluValProPhe                                 |
| HIF 10499<br>(Δ47260) | 98-7              | ttggaagaagaaccacaagagcgcgaagcagctgaatattggcagctctaaaggaaagagatttggcttactggagccatcacagggaattggattcaggaattggattcaggaattggattcctttt<br>TtpArgGluThrLysGluArgLysAlaAgluIleLeuAlaValLeuLysGluLysArgPheValLeuLeuLeuLeuaspolyIleGluInuGluLeuLeuaspolyIleGluValProPhe                       |
|                       | 105-12            | ttggaagaagaaccacaagagcgcgaagcagctgaatattggcagctctaaaggaaagagatttggcttactggagccatcacagggaattggattcaggaattggattcaggaattggattcctttt<br>TtpArgGluThrLysGluArgLysAlaAgluIleLeuAlaValLeuLysGluLysArgPheValLeuLeuLeuLeuaspolyIleGluInuGluLeuLeuaspolyIleGluValProPhe                       |
| AT5G47280             | HIF 10499<br>(WT) | Ggtctaccttggctctgaaagtccttggcgcctctcattcaaacgatcgacctgaaacataattgggcaattggcagggtttacaagggtttacaagctttgatgaacctcagagatcaagctttgct<br>GlyLeuProLeuSerLeuLysValLeuGlyAlaSerLeuAsnAspArgProGluThrTyrTrpAlaIleAlaValGluArgLeuSerArgGlyGluProValAspGluThrHisGluSerLysValPheAla            |
|                       | 170-4             | ggctctaccttggctctgaaagtccttggcgcctctcattcaaacgatcgacctgaaacataattgggcaattggcagggtttacaagggtttacaagctttgatgaacctcagagatcaagctttgct<br>GlyLeuProLeuSerLeuLysValLeuGlyAlaSerLeuAsnAspArgProGluThrTyrTrpAlaIleAlaValGluArgLeuSerArgGlyGluProValAspGluThrHisGluSerLysValPheAla           |
| HIF 10499<br>(Δ47280) | 172-9             | ggctctaccttggctctgaaagtccttggcgcctctcattcaaacgatcgacctgaaacataattgggcaattggcagggtttacaagggtttacaagctttgatgaacctcagagatcaagctttgct<br>GlyLeuProLeuSerLeuLysValLeuGlyAlaSerLeuAsnAspArgProGluThrTyrTrpAlaIleAlaValGluArgLeuSerArgGlyGluProValAspGluThrHisGluSerLysValPheAla           |
|                       | 176-15            | ggctctaccttggctctgaaagtccttggcgcctctcattcaaacgatcgacctgaaacataattgggcaattggcagggtttacaagggtttacaagctttgatgaacctcagagatcaagctttgct<br>GlyLeuProLeuSerLeuLysValLeuGlyAlaSerLeuAsnAspArgProGluThrTyrTrpAlaIleAlaValGluArgLeuSerArgGlyGluProValAspGluThrHisGluSerLysValPheAla           |

Supplementary Figure S6 | AT5G47260 and AT5G47280 mutated sequences in CRISPR-Cas9 edited lines in Bur-0 and HIF 10499 backgrounds. DNA and corresponding predicted protein sequences are detailed. Guide RNAs are highlighted in green and protospacer-adjacent motif (PAM) in blue. Mutations within AT5G47260 and AT5G47280 coding sequences are shown in red. aa, amino acids.

**At5g47260**

```

MGNNFSVESPSLAPFLCGKRKYLYLNRNLERLEALHKVMQDLNAMRNDLLKRLSKBEEIGLQGLQEVKWEISMVEEI -75 - Col-0
...T..... -75 - Bur-0
..... -75 - Bur-0 (Δ47260) 117-1
..... -75 - Bur-0 (Δ47260) 117-36
..... -75 - Bur-0 (Δ47260) 85-7
..... -75 - 10499 (Δ47260) 95-14
..... -75 - 10499 (Δ47260) 98-7
..... -75 - 10499 (Δ47260) 105-12

CC + linker
EPKANRLLEDSEVSEIQRLSRYGYCSLIPASTYRYSEKVLTTMEGVETLRSGVFEAVVHRALPPLVIKMPPIQL -150 - Col-0
..... -150 - Bur-0
..... -150 - Bur-0 (Δ47260) 117-1
..... -150 - Bur-0 (Δ47260) 117-36
..... -150 - Bur-0 (Δ47260) 85-7
..... -150 - 10499 (Δ47260) 95-14
..... -150 - 10499 (Δ47260) 98-7
..... -150 - 10499 (Δ47260) 105-12

VG-motif P-loop/Kin-1 RNBS-A
VSOAKLLDWTAWARLMDINVGTLGIYGRGGVGGKTTLLTKLRNKLVDAAFLVIFVVVGFEEVESIQDEIGKRLGLQ -225 - Col-0
..... -225 - Bur-0
..... -225 - Bur-0 (Δ47260) 117-1
..... -225 - Bur-0 (Δ47260) 117-36
..... -225 - Bur-0 (Δ47260) 85-7
..... -225 - 10499 (Δ47260) 95-14
..... -225 - 10499 (Δ47260) 98-7
..... -225 - 10499 (Δ47260) 105-12

WalkerB/Kin-2 RNBS-B
WRRETKERKAARILAVLKEKRFVLLLDGICRELDLEEIGVPPPSRDNGCKIVFTIQSLEACDESKWVDAKVEITC -300 - Col-0
..... -300 - Bur-0
..... -259 - Bur-0 (Δ47260) 117-1
..... -294 - Bur-0 (Δ47260) 117-36
..... -260 - Bur-0 (Δ47260) 85-7
..... -295 - 10499 (Δ47260) 95-14
..... -260 - 10499 (Δ47260) 98-7
..... -249 - 10499 (Δ47260) 105-12

RNBS-C GLPL
LSPPEAWDLFQETVGENTLRSHQDIPKLARVVASTCRGLPLALNLIIGEAMSGKRTVREWRYTIHVLASSTAEFPD -375 - Col-0
..... -375 - Bur-0

RNBS-D
MEDGTLPIKLSIYDNMSDEIIRLDFLYCALFENLDIGKEDLVNYYWICEGILAKEDREEAEIQGYEICDLVRMR -450 - Col-0
..... -375 - Bur-0

MHD LLR1
LLMESGNGNCVKVHGMVREMLWIASEHFVVVGGERIHQMLNVNDWRMIRRMSVTSTQIQNISDSPOCSLFTLL -525 - Col-0
..... -375 - Bur-0

LLR2 LLR3 LLR4
FRNRHLKWIISGAFFQWMTGLVVLDSLFRNRELAELPEEVSSIVLLRFLNLSWTCIKGLPLGLKELKSLIHLDLDDY -600 - Col-0
..... -375 - Bur-0

LLR5 LLR6 LLR7
FSNLQEVVDVIASLIINLQVLRFLFHSVSMDLKLMEDIQLKSLKELSLTVRGSSVLQRLLSIQRLASLIRRLHLET -675 - Col-0
..... -375 - Bur-0

LLR8 LLR9
TIVDGGILSLNAIFSLCELDLIGCNILEITIDWRCTIQREIIPQFQNI RTMTIHRCEYLRLDTWLLAPCLGELS -750 - Col-0
..... -375 - Bur-0

VSECPQMEEVISKDKAMAKLNTSEQPFQNLTKLVLDGLPKLESYWTPLPFPVLEYLVIRRCPELRRLPFNSES -825 - Col-0
..... -375 - Bur-0

TIGNQVETIIEEQVIKIVWEDEATKQRFSHFNRRDFVQMAEDPKMDGLTSESHPICTIDLVTGTTGSGETATANN -900 - Col-0
..... -375 - Bur-0

AIG1-type Nucleotide Binding Domain
IQGKRVVQSGTHATVVTMECPYKVFPPDCPINNMIDTPGTNFLLCYT -948 - Col-0

```

**Supplementary Figure S7 | Full alignment of AT5G47260 protein sequences in CRISPR-Cas9 edited lines in Bur-0 and HIF 10499 backgrounds.**



**At5g47280-ADR1-L3**

P-loop/Kin-1 RNBS-A  
 MLFNLNDEARIIGISGMIGSCKTILAKELARDEEVRGHFANRVFLTVSQSPNLEELRSLIRDFLTGHEAGFGTA -75 - Col-0  
 ..... -75 - Bur-0  
 ..... -75 - Bur-0 (Δ47280) -21-20  
 ..... -75 - Bur-0 (Δ47280) -160-2  
 ..... -75 - Bur-0 (Δ47280) -163-16  
 ..... -75 - 10499 (Δ47280) -170-4  
 ..... -75 - 10499 (Δ47280) -172-9  
 ..... -75 - 10499 (Δ47280) -176-15

Walker B/Kin-2 RNBS-B RNBS-C  
 LPESVGHTRKLVILDDVTRTRESLDQLMFNIPGTTTLVVSQSKLVDPRTTYDVELLNEHDATSLFCLSAFNQKSV -150 - Col-0  
 ..... -150 - Bur-0  
 ..... -150 - Bur-0 (Δ47280) -21-20  
 ..... -150 - Bur-0 (Δ47280) -160-2  
 ..... -150 - Bur-0 (Δ47280) -163-16  
 ..... -150 - 10499 (Δ47280) -170-4  
 ..... -150 - 10499 (Δ47280) -172-9  
 ..... -150 - 10499 (Δ47280) -176-15

GLPL ← 
GLPLSLKVL
GASLNDRPETYWAIAVERLSRGE
PVDETHESKVFAQIEATLENLDPK
TKE
  
 SGFSKSLVKQVVGESKGLPLSLKVLGASLNDRPETYWAIAVERLSRGEPVDETHESKVFAQIEATLENLDPK -225 - Col-0  
 ..... -225 - Bur-0  
 ..... -197 - Bur-0 (Δ47280) -21-20  
 SGFSKSLVKQVVGESKGLPLSLKVLG--TIALKHIGQL-SVERLSRGEPVDETHESKVFAQIEATLENLDPK -222 - Bur-0 (Δ47280) -160-2  
 ..... -197 - Bur-0 (Δ47280) -163-16  
 ..... -178 - 10499 (Δ47280) -170-4  
 ..... -197 - 10499 (Δ47280) -172-9  
 SGFSKSLVKQVVGESKGLPLSLKVLGDLKHIGQLQWRGTOEVNLLMKLMRVKCLLKSQQL-STOP -210 - 10499 (Δ47280) -176-15

RNBS-D MHD  
 CFLDMGAFPEGKKIPVDVLIINMLVKIHDLEDAADFVLDVLANRNLLTLVKDPTFFVAMGTSYYDIFVTQHEVLRD -300 - Col-0  
 ..... -300 - Bur-0  
 ..... -297 - Bur-0 (Δ47280) -160-2

VALHLTNRGKVSRRDRLLMPKRETMLPSEWERSNDEPYNARVVSIHTGEMTEMDWFDMPKAEVLIVNFSSDNY -375 - Col-0  
 ..... -375 - Bur-0  
 ..... -372 - Bur-0 (Δ47280) -160-2

LLR1 LLR2 LLR3  
 VLPFFIAKMGMRLRVFVIINNGTSPAHLHDFPIPTSLTNLRSWLERVHVPELSSSMIPLKNLHKLYLIICKINNS -450 - Col-0  
 ..... -450 - Bur-0  
 ..... -447 - Bur-0 (Δ47280) -160-2

LLR4 LLR5 LLR6  
 FDQTAIDIAQIFPKLTDITIDYCDLAEPLSTICGITSLNSISITNCPNIKELPKNISKLQALQLLRLYACPELK -525 - Col-0  
 ..... -525 - Bur-0  
 ..... -522 - Bur-0 (Δ47280) -160-2

LLR7 LLR8 LLR9  
 SLPVEICELPRLVYVDISHCLSLSSLPEKIGNVRTLEKIDMRECSLSSIPSSAVSLTSLCYVTCYREALWMMWKEV -600 - Col-0  
 ..... -600 - Bur-0  
 ..... -597 - Bur-0 (Δ47280) -160-2

EKAVPGLRIEATEKWFNMTWPDE -623 - Col-0  
 ..... -623 - Bur-0  
 ..... -600 - Bur-0 (Δ47280) -160-2

**Supplementary Figure S8 | Full alignment of AT5G47280 protein sequences in CRISPR-Cas9 edited lines in Bur-0 and HIF 10499 backgrounds.**

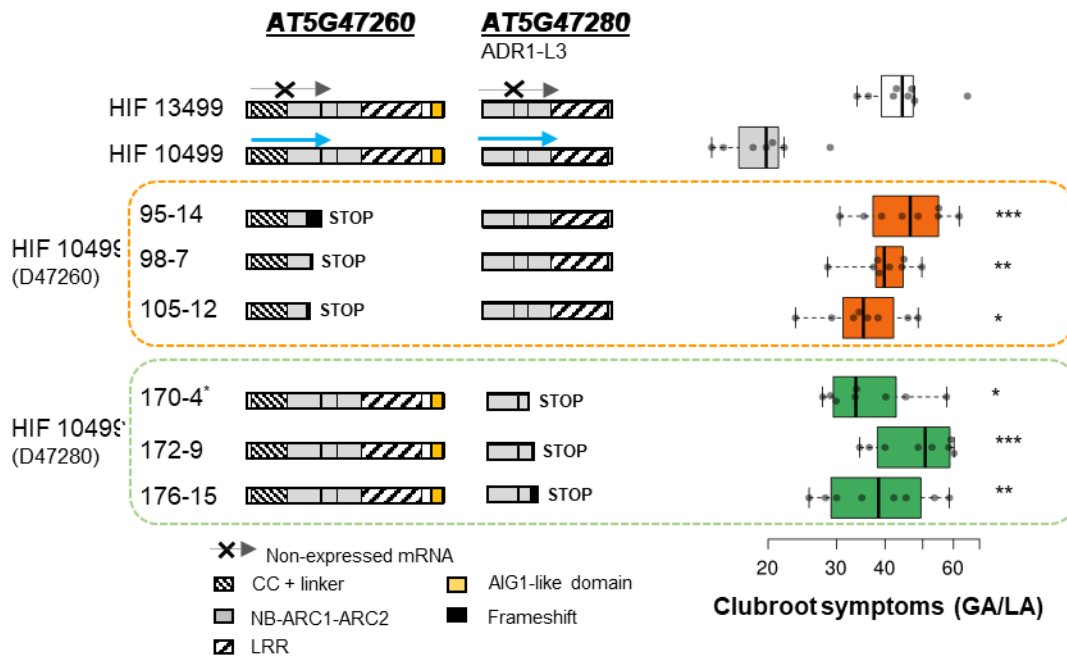

**Supplementary Figure S9 | Effect of *AT5G47260* or *AT5G47280* knock-out on GA/LA index (disease symptoms) in HIF 10499 background.** Cas9-mediated mutations were obtained in the HIF 10499 genetic background. For each targeted gene, three independent lines harbouring independent homozygous mutations were used. Line 170-4 no longer has the CRISPR-Cas9 cassette. For each line, the mean clubroot symptoms score (GA/LA) was obtained by modelling raw data of eight biological replicates (with 10 to 12 individual plants per replicate). Center lines show the medians; box limits indicate the 25th and 75th percentiles as determined by R software; whiskers extend 1.5 times the interquartile range from the 25th and 75th percentiles, data points are plotted as open circles. Edited line GA/LA values statistically different from 10499 GA/LA value are indicated by stars (from Dunnett 's test) with the following code: \*  $p$ -value <0.05; \*\*  $p$ -value <0.01; \*\*\*  $p$ -value <0.001.

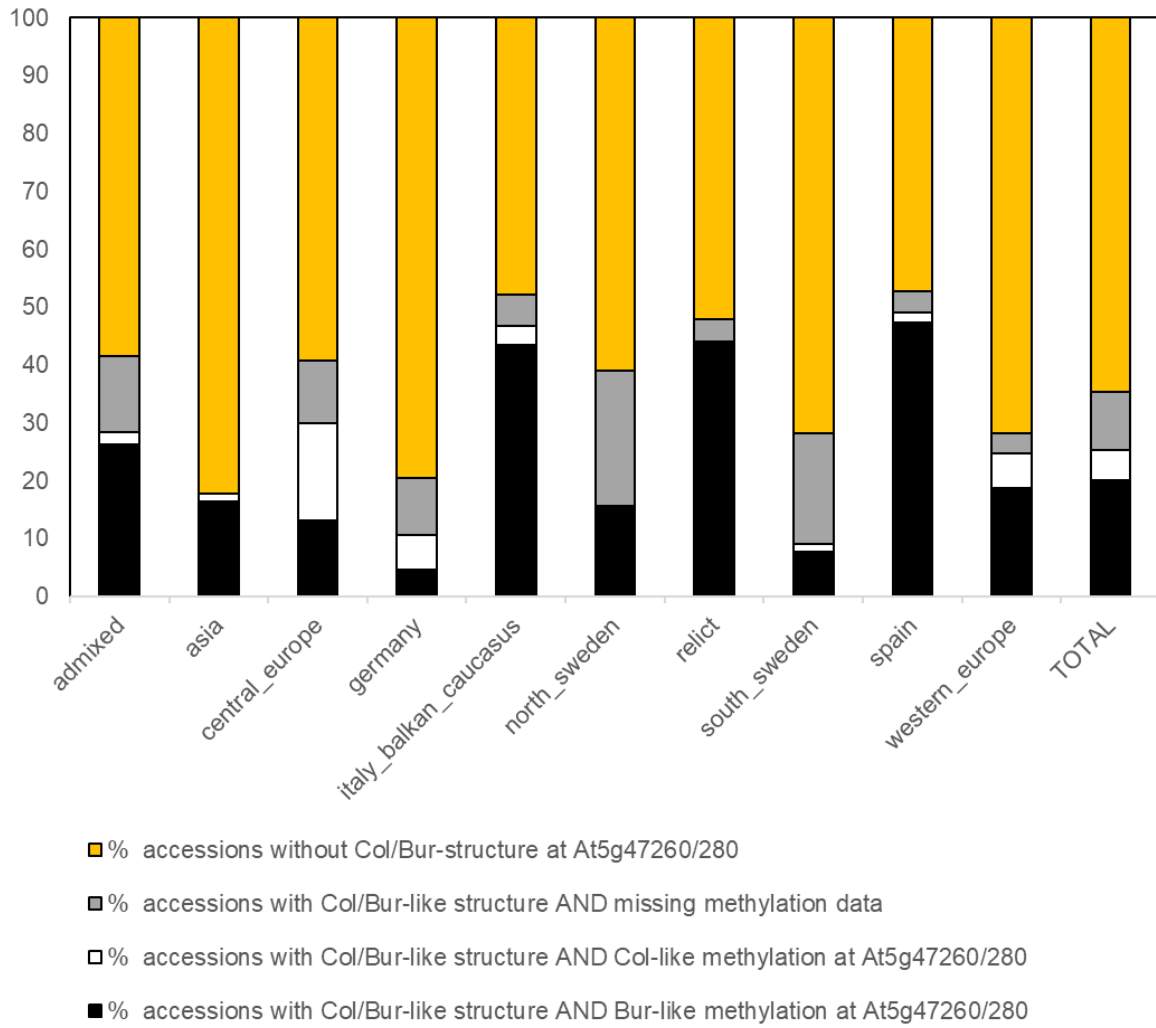

**Supplementary Figure S10 | Proportion of structural and epigenetic variations on the locus *Pb-At5.2* among *Arabidopsis* accessions in each admixture group (details in Supplementary Data 2).**

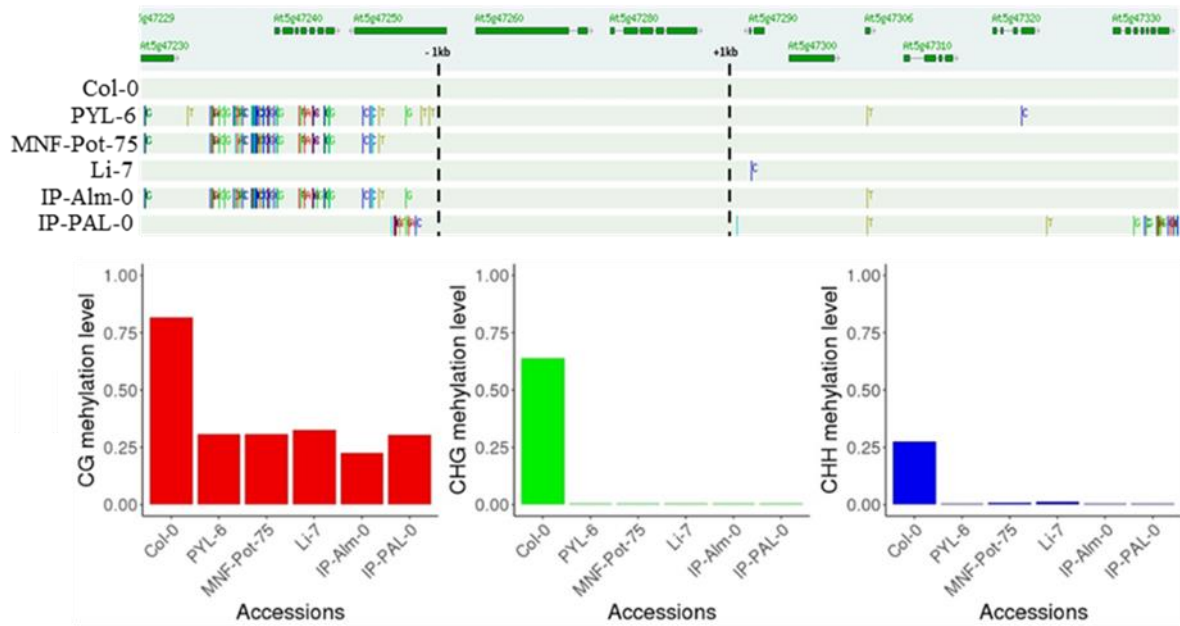

**Supplementary Figure S11 | The epigenetic variation on *AT5G47260* and *AT5G47280* is not related to SNP variations on *AT5G47260*.** Sequence variant data were obtained from the signal SALK genome browser based on 1001 genome data. Average methylation level was calculated between 1 kb before the TSS site of *AT5G47260*, up to 1 kb after the TSE site of *AT5G47280*.

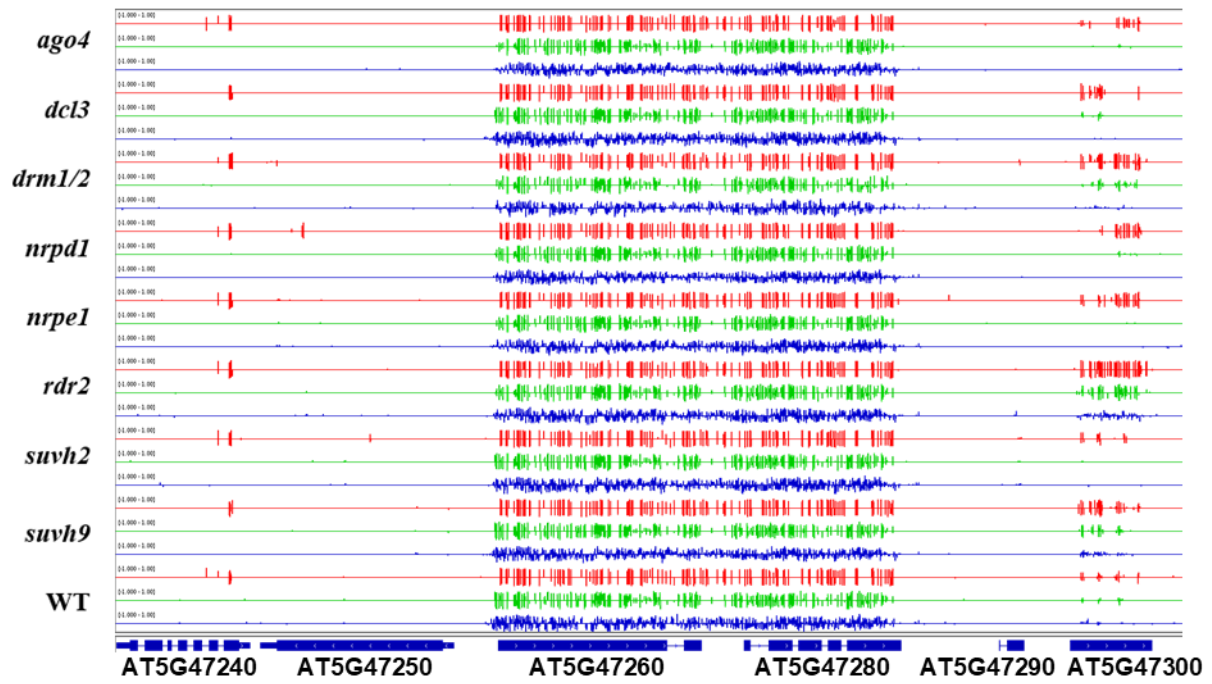

**Figure S12 | Methylation of *PbAt-5.2* region in Col-0 and in mutants in genes involved in RdDM methylation maintenance (Stroud et al., 2013). In red the methylation in CG context. In blue the methylation in CHG context; in green the methylation in CHH context. WT indicates the methylation profile of Col-0.**

## Supplementary Text S1: Details of *PbAt5.2* fine mapping

### Previous identification of *PbAt5.2*

A previous screen of *Arabidopsis thaliana* accessions found that Bur-0 is partially resistant to the *P. brassicae* eH isolate, whereas the canonical accession Col-0 is fully susceptible<sup>1</sup>. Two progenies were used to identify QTL controlling resistance to eH by linkage analysis: the first was derived from an initial Bur-0 (NASC accession N1028) x Col-0 (NASC accession N1092) cross followed by 6 generations of SSD (Recombinant Inbred Line set 20RV described in <sup>2</sup>). The second was derived from Col-0 x Bur-0 (described in <sup>3</sup>). These approaches led to the identification of a series of four additive QTL, including *PbAt5.2* ( $R^2=20\%$ , Bur-0 allele at this locus confers partial resistance). The QTL peak of *PbAt5.2* was at the marker C5\_19316 (around 19.3 Mb), with a confidence interval of 4.3 cM, between positions 18.7 Mb and 20.3 Mb (157 annotated genes between *At5g46260* and *At5g47690*).

### HIF499 for *PbAt5.2* validation

Among the RIL set 20RV from Simon et al. (2008), one RIL line (RIL499) displayed a single residual heterozygous region including markers c5\_17570, c5\_19313 and c5\_20318, framed by the homozygous loci c5\_14766 and c5\_21319. Heterogeneous Inbred Family (HIF) lines 10499 and 13499 were derived from RIL499 to obtain homozygosity at this locus (Institut Jean Pierre Bourgin, INRAE Versailles, France). These lines are near-isogenic, with identical combinations of Bur-0 and Col-0 homozygous genome sequences at every locus, except in the region between c5\_14766 and c5\_21319. The use of PCR-based markers (**Supplementary Data 1 Sheet 1**) allowed us to reduce this interval between markers CL5\_15283 and CL5\_20983 (excluded). HIF line 10499 displayed a higher level of partial resistance to eH isolate compared to 13499, thus confirming the position of *PbAt5.2* in this interval (<sup>4</sup>, see also the Figure 1 in the present work).

### Generation and phenotyping of F1 individuals derived from crosses between 10499 and 13499

Fine mapping of *PbAt5.2* started from the cross between HIF-13499 (allele Col-0) and HIF-10499 (allele Bur-0) lines. Crosses were made in both directions, *i.e.* using one or the other parent as female. Heterozygosity in the *PbAt5.2* region was checked in several F1 individuals using a series of PCR-based markers (**Supplementary Data 1 Sheet 1**). Clubroot index was evaluated in a series of F1 plants using the eH isolate, and was statistically identical to 13499, and higher than for 10499, thus suggesting that the Bur-0 resistant allele at *PbAt5.2* was recessive (**Supplementary Fig. 2**).

### Screening of recombinant individuals in the segregating F2 progeny

One validated F1 plant was chosen from each of the two crosses. Those two plants were self-pollinized and approximately 3200 F2 plants were sown (about 1600 from each cross). Individual F2 from number 1 to 1581 were from a 10499 x 13499 cross. Individual F2 plants from 1582 to 3153 were from a 13499 x 10499 cross. DNA was extracted from young leaves sampled from these 3152 plants, and then subjected to a first round of genotyping using a series of 10 KASPAR SNP markers (list in **Supplementary Data 1 Sheet 2**). Analyses were performed on the GENTYANE platform using a LightCycler 480 device (UMR INRAE 1095, Clermont-Ferrand France). Due to low DNA concentrations in some samples, about 6% of the

genotyping points were 'negative'. Good or average-quality (i.e. genotyping ambiguity at maximum one marker) data were obtained for 2751 F2 individuals. Among those, 563 plants displayed at least one recombination in the region between *At5g37660* and *At5g51670*, which represented about 20.5 % of the F2 plants, and was consistent with the distance of about 22 cM between those two marker genes (**Supplementary Data 1 Sheet 3**). This mean value of 20.5 however masked a clear disparity between genotypes derived from the 10499 x 13499 cross (32% of individuals with one recombination in the region) from the 13499 x 10499 cross (18% of individuals with one recombination in the chromosomal region). Nevertheless, most of this disequilibrium was focused in the region between the markers on *At5g42520* and *At5g44630* (i.e. outside the confidence interval of the clubroot resistance *PbAt5.2* QTL), and the male x female direction of the initial hybridization step did not affect the recombination rate in the region corresponding to the peak of the QTL (between *At5g46910*, *At5g47120* and *At5g47510*).

### **Phenotyping of recombinant F3 lines**

One hundred and seven recombinant F2 lines were selected based on the presence of a recombination event near the closest markers to the QTL peak (19.3 Mb). Using the seeds derived from the selfing of those individual lines, the clubroot symptoms were estimated from 18 inoculated F3 plants (6 plants x 3 biological replicates). Those phenotyping data confirmed the presence of a segregating resistance locus in the region (**Supplementary Data 1 Sheet 4**). Lines with Bur or Col homozygous alleles at markers *At5g47120/At5g47510* displayed a mean GA/LA (clubroot symptoms) of 37.1 (SE=7.3) and 87.2 (SE=14.1), respectively. Lines with heterozygosity at those two markers displayed a mean GA/LA of 76.7 (SE=16), which was consistent with the above conclusion that the resistance Bur-0 allele was apparently recessive.

### **High-density genotyping of recombinant F2/F3 lines**

A subset of 69 F2 recombinant lines was selected, based on the presence of a recombination event near the closest markers to the QTL peak (19.3 Mb). For each of these, 12 to 18 F3 progeny individuals were grown and their leaves were bulk-sampled, for subsequent analysis of 93 SNP (**Supplementary Table 1 Sheet 5**). All leaf samples were analyzed at the GENTYANE platform. SNP genotyping was performed with the KASPAR genotyping chemistry and Dynamic Array™ IFC 96\*96 (UMR INRAE 1095, Clermont-Ferrand France). Genotyping data obtained from bulked leaves of F3 individuals represents the genotypes of the parental F2 individuals. This genotyping workflow was also applied to a series of non-recombinant F2 lines and parental HIF 10499 and 13499 lines, which were used as controls. The comparison of the 93 SNP genotyping data and clubroot GA/LA index for all those 69 lines (**Supplementary Table 1 Sheet 6**) finally led to the identification a small region between the markers K58=*At5g47230*prom (position 19,175,831 bp) and K65=*At5g47360* (position 19,214,446 bp). Due to the recessive status of the resistance allele, some recombinant lines with possibly interesting recombination events (especially in the line 1381) were not useful at this stage.

### **F4 lines with fixed alleles in the region of the resistance locus allowed further reduction of the *PbAt5.2* resistance locus interval**

DNA was extracted from 12 to 18 individual F3 plants derived from selfing a series of F2 recombinant lines. Among them, F3 lines with homozygosity in the region of the resistance locus were screened using the following PCR-based markers: CL5\_16921=*At5g42320*;

CL5\_17802=*At5g44200*; CL5\_18135=*At5g44900*; AF-NUD8; CL5\_19601=*At5g48375* (details in **Supplementary Data 1 Sheet 7**). Homozygous F4 seed stocks were then obtained from the selfing of the selected homozygous F3 lines, and thereafter used for additional clubroot phenotyping assays. From the resulting data the interval could be reduced to a region between markers K58=*At5g47230*prom (position 19,175,831 bp) and K64 (position 19,208,823 bp), as shown in the **Figure 1e** (detailed phenotyping data also in **Supplementary Data 1 Sheet 8**). Finally, every other SNP and indel in the region was analyzed by sequencing the PCR-amplified fragments from 2313-15, 1381-2, 2509-11, and 1600-5 (details of primers are given in the **Supplementary Data 1 Sheet 1**). This allowed a final confidence interval of 26 kb between the marker CLG4 (19,182,401, in the promoter region of *At5g47240*), and the marker K64 (on SNP at position 19,208,823 bp, in *At5g47330*) to be identified.



## Supplementary Text S2: Influence of *PbAt5.2* on transcriptomic responses to clubroot infection

The analysis of transcriptome responses to isolate eH in 10499 and 13499 highlighted a series of 61 genes that were induced by infection only (or with higher range) in the presence of the resistance allele *PbAt5.2<sub>BUR</sub>* (**Supplementary Figure S5**). This series was enriched in genes associated with innate immunity, systemic acquired resistance, and notably included the SA-responsive gene *PR2*, and the set of genes *CYP71B15*, *CYP71A12/CYP71A13* involved in camalexin biosynthesis, confirming our previous studies on the cellular functions involved in clubroot resistance QTL *PbAt5.2*<sup>5,6</sup>. In contrast, a series of 58 genes was found to be induced by infection specifically (or with higher range) in the presence of the susceptibility allele *PbAt5.2<sub>COL</sub>*. This set of genes included *ARGAH2*, a JA-regulated arginase encoding a protein involved in the biosynthesis of N-delta-acetylornithine, previously shown to play a role in basal resistance toward the eH isolate in genotypes harbouring the susceptible allele Col-0 on QTL *PbAt5.2*<sup>6,7</sup>. This list also included the trehalase encoding gene *TRE1*, involved in resistance to massive amounts of trehalose synthesized by *P. brassicae* during clubroot infection<sup>8,9</sup>.



```

.....
720          640      650      660      670      680      690      700      710
Col
AGATTTGCTGTAAGTATCCACAAATTCGGATTCAATCTCTGGTAGTTACTTTTAAACATTGTGTACACACAAAAATTGAGGATCA
Bur
.....
Snp_K53_At5g47200
.....
810          730      740      750      760      770      780      790      800
Col
CATCTTGGAGTTC AATACCTGTTGCTCAAGACTCAAAACTCAAAGTCATTACTCCATTGGATTAGCTTAGTTCTCACTATGGTATCATT
Bur
.....
900          820      830      840      850      860      870      880      890
Col
GTTACTCCTTGTGTTCTTATTTCTGATATCTTGAATTTTATGTGGACAGGATGATTCCTTACCCTGGATAGCTACATAAGCACCATTGGT
Bur
.....
990          910      920      930      940      950      960      970      980
Col
GTTGACTTGTGTAAGCACCTTCATTTGCTCATCACTCAATTTATATACAGGAATCAGAATAATAAGTGTAACTTTACTAATGATATCATG
Bur
.....
1080         1000     1010     1020     1030     1040     1050     1060     1070
Col
CAGAAAAATTCGCACAGTTGAGCAGGACGGAAGACCATCAAACCTCCAGATCGTAAGTGTCTTCAGCTAGATATGCAATCATAAATCTGTT
Bur
.....
1170         1090     1100     1110     1120     1130     1140     1150     1160
Col
AAAAATTTTGGAAAGAGCAGATAGTTACTCTTGTGTTTGGTAATCGCCTGTGTATACAGTGGGACACAGCAGGCCAAGAACGTTTCAGGACA
Bur
.....
1260         1180     1190     1200     1210     1220     1230     1240     1250
Col
ATCACTAGCAGCTACTACAGAGGAGCTCATGGGATCATTGTATGTACTCTTACTCTAACCAACCAATCATCTTCTTGTAAATAACACAT
Bur
.....
1350         1270     1280     1290     1300     1310     1320     1330     1340
Col
CCTATACCTCTTGCTCACAATTGCCTATCTTTGCAGGTCACCTTATGATGTCACAGACCTAGAGAGCTTCAACAACGTCAAAACAATGGCTG
Bur
.....
1440         1360     1370     1380     1390     1400     1410     1420     1430

```

Col  
AATGAAATTGACCGTTACGCTAGCGAAAATGTGAACAAGCTACTGGTTGGGAACAAGAACGATCTCAC TTCACAGAAAGTTGTATCCACT  
Bur

1530 1450 1460 1470 1480 1490 1500 1510 1520

Col  
GAGACAGCTAAGGTAATTTTATAATAAACTAGGTGAAC TCTCTATCCACGTA AACCTTGTCTTAAAGAGAAATAACATTTTGTGTCTCA  
Bur

1620 1540 1550 1560 1570 1580 1590 1600 1610

Col  
TCTCCTTGTC CCAAGGCTTTTGCAGATGAAC TTGGGATCCCATTCTTGGAAACAAGTGCTAAAAATGCAACCAATGTGGAAGAAGCTTT  
Bur

1710 1630 1640 1650 1660 1670 1680 1690 1700

Col  
CATGGCTATGACTGCTGCAATTAAGACAAGGTTAGAACTAAATTTTACTTGTGAAGTCATTAACCCCTTACTTCCATACTTAAAAGGTT  
Bur

1800 1720 1730 1740 1750 1760 1770 1780 1790

Col  
TTGTTGTTTTCGCAGAAATGGCTAGCCAAACAGCTGGAGGTGCCAAGCCACCAACGGTCCAGATCCGTGGACAGCCAGTGAACCAGCAATC  
Bur

1890 1810 1820 1830 1840 1850 1860 1870 1880

Col  
AGGCTGTTGTTCTCTTGAATTCAATTAGTCACCACCTCTTTTCGATCATCACACCATTATGATCATTGTTTGCATTGCATGTTAGACT  
Bur

End At5g47200 →

1980 1900 1910 1920 1930 1940 1950 1960 1970

Col  
TCTCCAAATAACAACCTTTGGATCC TTTTGC TTGTTTTCATTGCTTTCTTTGATCCGATTCTTTCTGATGTACGTTGAAGTTTG  
Bur

2070 1990 2000 2010 2020 2030 2040 2050 2060

Col  
AAACCCATAACTTCTATATAGTAAAAGGCTTTTATGCAAAATAATGTAGAGCAC TCTTAAATGCC TTCGACGATTCATAATCATCGCTCA  
Bur

2160 2080 2090 2100 2110 2120 2130 2140 2150

Col  
AGTATGAAAGATACTAGATATCGTGCTATTAGAAAATACTTCA TTTATGATGTACGAAAAGAAAGATCGAATGTGTAATACCAAAATTA

Bur

.....  
 2170 2180 2190 2200 2210 2220 2230 2240  
 2250

Col

GAGAGAAAAATATCTTAATAATTTTTTCATAACTTAAAAAACGTAATAGTTTCGCAGAAAAGACCTTCAGAAAGTGTAAACAAAAATTA

Bur

.....  
 2260 2270 2280 2290 2300 2310 2320 2330  
 2340

Col

TAAAACTAACAAAATTCAACCAAAGAGAAACGAAAGACAGAGATAGCGAGGCTGAAGGACCAGGGGTCTTATAGCCCAACGAAGGGAA

Bur

End At5g47210 ←

.....  
 2350 2360 2370 2380 2390 2400 2410 2420  
 2430

Col

CTGAGCTGTCTCCAATCGCCGGAGCTGCAGCTTCTTTTGCCATACCTTGGTTCTCCTTCACCACGACCACCGCGACCTCCTCTTCC

Bur

A.....

Snp K54

.....  
 2440 2450 2460 2470 2480 2490 2500 2510  
 2520

Col

GCGGGAGCCTCCACCTCTCCCGTTGTACCTCTTTCCATCAGCCGGCTTCAAGAACTCATTAATGCTCAACGACTACAAAATCACCACAAA

Bur

.....  
 2530 2540 2550 2560 2570 2580 2590 2600  
 2610

Col

TCTCAGGTAAAAAATGACACAACCCAAAAGAAATCATGAAGTGAGAACAGAAAGAACTAAGACCTTTTTGGCCTTCTCAGTAGCATC

Bur

.....  
 2620 2630 2640 2650 2660 2670 2680 2690  
 2700

Col

TTTGCGTTTTTCCCTTGTGAGATCCCTGAAACAAATAAAATACCAAGTATTAACTATTGCTCCGTTACAGTGAAGGGAATAGATAAACTGAA

Bur

.....  
 2710 2720 2730 2740 2750 2760 2770 2780  
 2790

Col

CAGTAGATGATTTTCTGACCAGCTTGAAGAAGATTTTCATCGGTGTTCTTCTTGTAGAGAGCTGTTGCATGGACTCAAACACTTTGG

Bur

.....  
 2800 2810 2820 2830 2840 2850 2860 2870  
 2880

Col

TGTCAACTTTCCTTCCCAACCCTTGTGGCTTGCAGAGCCTTCTTCTTCTCCAGAAATTTCTCATACTCTTCTAGAGTCACTCCT

Bur









5220

Col  
ACCAATAACTCATCAACACGTGCTCTCATCACCAACCTCACACTTCACCTGCACCACCTCCGACGTCAGATTCTCTGCTTTTCTCCFTTCGT  
Bur

5230 5240 5250 5260 5270 5280 5290 5300

5310

Col  
TTC AAC TTCCCGTTTTCAGACGACGACGTAGAAGAGGACGACGACGACGACGAAGAAGATCTCTTAGACGTGATCCGAACCGGGTCA  
Bur

A

Snp\_K55

5320 5330 5340 5350 5360 5370 5380 5390

5400

Col  
GGTTCACCGGAATTAACCCCTCAACGGAATAATCAATAAGCGGGAAACCACGCATCCATAAAGCAGCTATATCGTAAGCTAAAGCCGCA  
Bur

A

Snp\_K56

5410 5420 5430 5440 5450 5460 5470 5480

5490

Col  
TCTTCGCGCGTCTCAAACGTCCCTAACCAACCCCTAGCTCCATTCTTCGCGGATCACGTATCTCCGCGCGAATTTCCCCACGGTCTC  
Bur

5500 5510 5520 5530 5540 5550 5560 5570

5580

Col  
TGCCCTCACTCCTCTGTAATGCTTCGCCCTCACCTGCGGTAAACGGTATCGCTTCTTTGGTTTCTCCTCCATCGCGTAAAGTTT  
Bur

5590 5600 5610 5620 5630 5640 5650 5660

5670

Col  
TCAGTTGGCTCGACTTTAACCGCCGAAAAATCAAAAAGACAGCTCAAGTCCGATGATGACGTGTCAAAATGGAAGGCATCTTTGAGGAGT  
Bur

5680 5690 5700 5710 5720 5730 5740 5750

5760

Col  
CCGTACCAACATGTCCTCTGAATCATTTCTTTCAATGGCAAACCTCCCCAACTCTCTGTGAAACACGAACCTCGGTGTTGACTCATTG  
Bur

T

Snp\_K57

5770 5780 5790 5800 5810 5820 5830 5840

5850

Col  
AGTCGCAGCTCGTCTCTCCTCCTCCTAGCAAGTGACGTGTTATCGACTCCAAACAAAGCGTAGTCGGATTCTATATTGCACTGTCCG  
Bur

5860 5870 5880 5890 5900 5910 5920 5930

5940

Col  
TACATTTTCAGAGAACTAACTATAGAGTTTTTTTTGTTTTGTTGATTGATTTATCAAAATATCTGAACTTTTTCTATGTGGAAGGTGGT





.....  
7560            7480            7490            7500            7510            7520            7530            7540            7550  
.....  
Col  
A T T T T C A A A T G T C A T G A T G A T C A T C A T T T A A T C T T A G T T G T T T T A G T C A C A T C T T A T T A T G C T T A T T A T T A G T C G G T G A T A G T T T A A T T T  
Bur  
.....  
7650            7570            7580            7590            7600            7610            7620            7630            7640  
.....  
Col  
T A A G A C G T A A A T C A T C T A T T C T C A T A T T A T G C T A G A A C A A A C T T T T T C T T T G T G C A A C C T C C T A G A A C A T A T A G T C G C C T A T T A T C C A T G  
Bur  
.....  
7740            7660            7670            7680            7690            7700            7710            7720            7730  
.....  
Col  
G A T C C C A G A T A C T C C T C C A A G A C C A C C G A A A G G T T T A A T T A T G G A T A G G A A C C C T T T G G T C T A C G T T A A C A C C T T G A T T G A C T T C C A G A C  
Bur  
..... G .....

7830            7750            7760            7770            7780            7790            7800            7810            7820  
.....  
Col  
G A A G A G G T G G A A A G T A G A T C G T C T A C G G A G T T G T T C C C C C C C C C C C C C C C G A G G A T A T T A C T T T G A T T T T A G G G A T A A A A C C G A G G C  
Bur  
.....

7920            7840            7850            7860            7870            7880            7890            7900            7910  
.....  
Col  
T A A A T G T C T C G C G A G A T G G A T A T A G T T G G A C A T T G A C T A A G T T C G G T A A T T A T A C T G T C A A G A C A A G A T A T G A A G C T G C G A G A G C C C T C T  
Bur  
.....

8010            7930            7940            7950            7960            7970            7980            7990            8000  
.....  
Col  
C T C G C C C G T C T T G C G A C C A C C C T C T T C A G G G A C C T A G T G T T A C G G C A C T A A A G G C G C A A G C G T G G A A A T T A A A A C T A C A C G A A A G C T A A  
Bur  
.....

8100            8020            8030            8040            8050            8060            8070            8080            8090  
.....  
Col  
A G C A T T T T G T G T A G C A A T G T G T G T C A G A G T G T T T A G C A A C T T G T C A A C G C C T A T A T T T T C G C C A T A T T G G T A G A G A T A A A A A A T G T C C T A  
Bur  
.....

8190            8110            8120            8130            8140            8150            8160            8170            8180  
.....  
Col  
G A T G T G G G G C G G A T G A A G A A C C A T C A A T C A T T T A A T A T T T G A A T G T C C C C C G G C A A G A C A A G T C T G G G C C T A T C C G G T A T C C C T C C T  
Bur  
.....

8280            8200            8210            8220            8230            8240            8250            8260            8270  
.....





Col  
CAGTTTAGTGTAATTTTGTTAACTTTAAATCGATTCCTAATTCATTTTAAATCAACACATCTATATGTAGGCAATTGGATGCAAAAGGTACAC  
Bur

9900 9820 9830 9840 9850 9860 9870 9880 9890

....|....|....|....|....|....|....|....|....|....|....|....|....|....|....|....|....|....|....|....|....|....|  
Col  
AAAACAATGCAAAAGGAAGGATCAAAGGAAAGATGTTATATGACACGTCAGCAGTATTCAAAGTTTGAAGTTGAACAAATCTAGTCATG  
Bur

9990 9910 9920 9930 9940 9950 9960 9970 9980

....|....|....|....|....|....|....|....|....|....|....|....|....|....|....|....|....|....|....|....|....|....|  
Col  
TTTGACTTGGACCCTGACTTTTCAAACCTATCTTTTATTAGTAGCAAACCTCAGTTCCATACGTGCAAAACAACCTCACACGTGCGTTCCC  
Bur

10080 10000 10010 10020 10030 10040 10050 10060 10070

....|....|....|....|....|....|....|....|....|....|....|....|....|....|....|....|....|....|....|....|....|....|  
Col  
ACCGCAATGTTTGAGGTTTCTTCAACAGAAGACGATATTTCTTATTATTATAACGTTAGATTGAGAATTCAAAGATTCTCGACAAATGA  
Bur

10170 10090 10100 10110 10120 10130 10140 10150 10160

....|....|....|....|....|....|....|....|....|....|....|....|....|....|....|....|....|....|....|....|....|....|  
Col  
ATGGTAACTTTTTCTATAAGAAATCACAAATAAGTTTTAGTTATACAAATTTATAATGTTGGAGTAATTGTCACATAGATGATTGGTT  
Bur

10260 10180 10190 10200 10210 10220 10230 10240 10250

....|....|....|....|....|....|....|....|....|....|....|....|....|....|....|....|....|....|....|....|....|....|  
Col  
GGTGATAATAGTTGTTTATGTATGATTGATCAATTAACCTTAATAATTTCCATTGGAATAATATTTCTTGACCTTAAATTTGGAATGT  
Bur

10350 10270 10280 10290 10300 10310 10320 10330 10340

....|....|....|....|....|....|....|....|....|....|....|....|....|....|....|....|....|....|....|....|....|....|  
Col  
AGATTTATATGGAAAAGTAGATAATCATTTTTGTGACGCTAATTAATAATGTTGTCCCATAACGACAGAAAAAAAAAATGAAACAAA  
Bur

10440 10360 10370 10380 10390 10400 10410 10420 10430

....|....|....|....|....|....|....|....|....|....|....|....|....|....|....|....|....|....|....|....|....|....|  
Col  
ATAGAGACCAGATTGGTTCAAGAAAACGACACACAGTTTAGGATGCTAAAAAAGCTTTGTTAGTACCATATGATTGTTATATTGTTATT  
Bur

10530 10450 10460 10470 10480 10490 10500 10510 10520

....|....|....|....|....|....|....|....|....|....|....|....|....|....|....|....|....|....|....|....|....|....|  
Col  
GGTCCCTAATAATGTAATTTAGACGTCAAAAAATGTTTTGTATTGATATGTGACCTCATAACTGGTTAGCTGCTTAGGGCCATTAGATT  
Bur





```

TAGAATCTAGTGAGTGAGTCGTTGATTCATTCACAAACCAGTTAATGCACCGCGTAAATCTTTTCACGTGCATGGTGCAGTGCATGAA
Bur
.....
11430      11350      11360      11370      11380      11390      11400      11410      11420
.....|.....|.....|.....|.....|.....|.....|.....|.....|.....|.....|.....|.....|.....|.....|.....|
Col
GATGGATCAAATTAATACGAAACCAAACATAAATCAATAGTATATCATCTTTTAAAAATTTGTATGATTAATAATCTCTGTCAATAAAG
Bur
.....
11520      11440      11450      11460      11470      11480      11490      11500      11510
.....|.....|.....|.....|.....|.....|.....|.....|.....|.....|.....|.....|.....|.....|.....|.....|
Col
GCCGCATGCATTGACTTGACTCTTTCAGTCTTGCTTGCTTACTAATTAAACCCTCCATAATGCATCAACCTAATCATAACCGAAAATTT
Bur
.....
11610      11530      11540      11550      11560      11570      11580      11590      11600
.....|.....|.....|.....|.....|.....|.....|.....|.....|.....|.....|.....|.....|.....|.....|.....|
Col
TCTGAGTTGTATTTGGTTAGACTTTAATGCTTTACTATCATTTTAGTTACGTTTGTGTTTACCTCGCAAAAAATCTTCTAGAAGGATAAT
Bur
.....
11700      11620      11630      11640      11650      11660      11670      11680      11690
.....|.....|.....|.....|.....|.....|.....|.....|.....|.....|.....|.....|.....|.....|.....|.....|
Col
ATAATACTACAATACAATGTTGGCATTATCCATTACTGAGCGGTGTGAAATTTGGTTTTGATTGTTTAAACATATGAGTTAAAAATTTGTTCC
Bur
.....
11790      11710      11720      11730      11740      11750      11760      11770      11780
.....|.....|.....|.....|.....|.....|.....|.....|.....|.....|.....|.....|.....|.....|.....|.....|
Col
CAATATTGGCAAATTAGCATCGGATATGCTATTGTATAAGAAAACGCTTATTTTTGGAGTGCGCGTCTACCTGTAACTGTATAAACTACG
Bur
.....
11880      11800      11810      11820      11830      11840      11850      11860      11870
.....|.....|.....|.....|.....|.....|.....|.....|.....|.....|.....|.....|.....|.....|.....|.....|
Col
TAACGAACCTTTGAACGCAGAGTGAATGTGAGTCTCTGTGACACGACTTAAAGCTTAATCAGAAGCAGATTATTGGACCTTATGGAGACT
Bur
.....
11970      11890      11900      11910      11920      11930      11940      11950      11960
.....|.....|.....|.....|.....|.....|.....|.....|.....|.....|.....|.....|.....|.....|.....|.....|
Col
TTATCAAGATTAGCTAATGAAGGTTACTATATATGAAACTTTGAAATAATTGTTTGCAGCCTTTTGGGATCAATAAACCATAAAAGCATT
Bur
.....
12060      11980      11990      12000      12010      12020      12030      12040      12050
.....|.....|.....|.....|.....|.....|.....|.....|.....|.....|.....|.....|.....|.....|.....|.....|
Col
GGTTTTGTTTTCTCTATCTATATCCAATTCGGAAAGTAGAAAACCTGGATTAGTAAAAATCATATTCACACATTGCGAAGAAAACTATG
Bur
.....
12070      12080      12090      12100      12110      12120      12130      12140
.....|.....|.....|.....|.....|.....|.....|.....|.....|.....|.....|.....|.....|.....|.....|.....|

```

12150

```

...|...|...|...|...|...|...|...|...|...|...|...|...|...|...|...|...|...|...|...|...|...|
Col
TGC GCGGATACGTTGGGAAAATCTGCGCATGGTTTAAAGTTTGTCTTCAGTCAATTATAAATTCGTTTTTTATACTCCCTCTGTTCCA
Bur
.....

```

12240

12160 12170 12180 12190 12200 12210 12220 12230

```

...|...|...|...|...|...|...|...|...|...|...|...|...|...|...|...|...|...|...|...|...|...|
Col
AGATACCTTGATATTTTGGGTTTTGCACAAAGAAATAAGAAAAGTAACTTTATATTTTTAATTATTCTTTTAGTTAGTTTAATAATATTA
Bur
.....A.....

```

12330

12250 12260 12270 12280 12290 12300 12310 12320

```

...|...|...|...|...|...|...|...|...|...|...|...|...|...|...|...|...|...|...|...|...|...|
Col
ATTTTACTTCTCATTTCATTATTGGTTACAAACAAAAATAATAATGATAGTTTTTCAAAACATCAATTTGGTGGAACAAATAAAAAA
Bur
.....

```

12420

12340 12350 12360 12370 12380 12390 12400 12410

```

...|...|...|...|...|...|...|...|...|...|...|...|...|...|...|...|...|...|...|...|...|...|
Col
ACTCAAAAATCAAAATACTTGAACAGAGGGAGTAGTTAATTAAAAAAGATATTTCCACTTTGACTTGGCGAAGCCTCATAACAATG
Bur
.....

```

12510

12430 12440 12450 12460 12470 12480 12490 12500

```

...|...|...|...|...|...|...|...|...|...|...|...|...|...|...|...|...|...|...|...|...|...|
Col
AAGTTATGTATGAACATATATGAAGTTAGAAACAATGGAAAACAGCTTGTAATAATTCATTGTTGTATATATGTTTTTTGGGTCAATT
Bur
.....

```

12600

12520 12530 12540 12550 12560 12570 12580 12590

```

...|...|...|...|...|...|...|...|...|...|...|...|...|...|...|...|...|...|...|...|...|...|
Col
TGTTGCATGAACAAAAATAAAAAGTAGATGAAAACCGGATATTTTGGTGTAAACATTTGCATTTGAACCTCGTGAAGACGGATAAAAG
Bur
.....

```

12690

12610 12620 12630 12640 12650 12660 12670 12680

```

...|...|...|...|...|...|...|...|...|...|...|...|...|...|...|...|...|...|...|...|...|...|
Col
CTCATTTTTGTTCTTTATTATATGGCTGCTATTAGTACACAGAGTTGAACTTTAGAATACTAAAAATCTCGACATCTTTTATTTTATTTT
Bur
.....

```

12780

12700 12710 12720 12730 12740 12750 12760 12770

```

...|...|...|...|...|...|...|...|...|...|...|...|...|...|...|...|...|...|...|...|...|...|
Col
TGTC AAGCATCGACATCTTTT CTGTTCAAGAAAACGACCGCAATAGTCGAATAATATAACTCTTGGACTAGTTAATATATATTTGCGATA
Bur
.....

```

CLG1: Clonage 1F

12870

12790 12800 12810 12820 12830 12840 12850 12860

```

...|...|...|...|...|...|...|...|...|...|...|...|...|...|...|...|...|...|...|...|...|...|
Col
GATTTTCGATCTCACTTATATCTTATAACCAAGAGACAAAAACAATATTGCAGTCAAGTACAAAACGAAAACAATCACAATGTCGACTAT

```



13680

Col  
ACCAAAACCGGAAGTTACTAAACCGGTTTCGGAAGAAGAGAAGCAATTACAGAGGAGTAAACAAAGACCGTGGGGAAATTCGCGGCG  
Bur

CLG2 Clonage 2R

13690 13700 13710 13720 13730 13740 13750 13760

13770

Col  
GAGATTTCGTGACCCGAATAAACCGGATCTCGCGTTTGGCTTGGGACGTTTGATACAGCGATTGAAGCGGCTAGAGCTTATGACGAAGCA  
Bur

CLG3 Clonage

3E

13780 13790 13800 13810 13820 13830 13840 13850

13860

Col  
GCGTTTAGACTACGAGGATCGAAAGCGATTTTGAATTTCCCTCTTGAAGTTGGGAAGTGGAAACACCGCCGATGAAGGTGAGAAGAAA  
Bur

13870 13880 13890 13900 13910 13920 13930 13940

13950

Col  
CGGAAGAGAGACGATGATGAGAAAGTACTGTGGTTGAGAAAGTGTGAAGACGGAACAGAGCGTTGACGTTAACGGTGGAGAGACGTTT  
Bur

13960 13970 13980 13990 14000 14010 14020 14030

14040

Col  
CCGTTTGTAACTCGAATTAACCGAATTAATGACTGGGATTTAACGGGGTTTCTTAACCTTTCCGCTTCTGTCGCCGTTATCTCCTCAT  
Bur

14050 14060 14070 14080 14090 14100 14110 14120

14130

Col  
CCACCGTTTGGTTATTCACAGTTGACCGTTGTTGATTAGTTTTTTTTGAGTTTTTGAACGATGTGATGCTGACGTGGACGTACACGTA  
Bur

End At5g47230 →

14140 14150 14160 14170 14180 14190 14200 14210

14220

Col  
GGTGCATGCGATGAAAAAACATCTATTTGTTCAATTTTTGCGTTTTTCTATTTGTTCAATTTTTTCACAATCACAAATACATATTT  
Bur

14230 14240 14250 14260 14270 14280 14290 14300

14310

Col  
CAGTTAATGATTACGGATAATTTAGCTTACGTTAATTTATTATGAGTACTAGAAGAAATCGGAGTAAATCAACATATAGATTATACTAG  
Bur

14320 14330 14340 14350 14360 14370 14380 14390

14400

Col



15210 15130 15140 15150 15160 15170 15180 15190 15200

Col  
CGTCATCATACGACTATTCAATATCCAACATATTTATTTGGAAAACCCGACCACGAATAATGGTTAGCTTACATCAATTATCCACACAT  
Bur  
.....G.....A.....

15300 15220 15230 15240 15250 15260 15270 15280 15290

Col  
ACTCAAATGGTTAAATTTCTAGAATTGTAATGGAAGACACAATGTTATCACGAATGAGGATCATCATGCACCTTCAGGTTACCTAATTAT  
Bur  
.....

15390 15310 15320 15330 15340 15350 15360 15370 15380

Col  
CCTACGTGGACAAATACCTAATCCCTCCATGATTTTCAATTATTGCAGATAATTTTCTGAACGTCATCATTTCCCATAACGAATAATCAT  
Bur  
.....G.....

15480 15400 15410 15420 15430 15440 15450 15460 15470

Col  
TTCCTCAATCAACGCAACCTAACTAT-  
CTATGTCATTTACATGTTTATGTGGTAAAAATCTGCTTAGAATAAGTAAACCTTCACATATA  
Bur  
.....A.....

15570 15490 15500 15510 15520 15530 15540 15550 15560

Col  
TATTTGTAACAAAATAATTGAGGTTAATGTTATTCAATGCGAAAAAATGTAAACACTTGCTAATGAGTCGTAATAACCCATATATTATTTT  
Bur  
.....G.....

15660 15580 15590 15600 15610 15620 15630 15640 15650

Col  
CCAAAACATGTTTCTATTGAAGTTACAAATTAAGTTTCCACTCTATTTGGATGGAGCGTACTAGTCGTAGACACGGAGAGCTTCCAAGTC  
Bur  
.....

15750 15670 15680 15690 15700 15710 15720 15730 15740

Col  
CATCGGATCAACTTATCAAACCTTATCGACCTTTTGGTCCACAACAAGATATCTTTTGTCCATCTTCATCATGGCTCTCGCAAGAAGGATGG  
Bur  
.....

CLG5: clonage 5 CLG4: clonage  
4R  
End At5g06965 (lncRNA) ←

15840 15760 15770 15780 15790 15800 15810 15820 15830

Col  
GTTACATATATGGTTTGTCTTATTGCTTAATAGGGATTAATTTCTCTAATACTTTTGAATTAGCTTTTCGCAAACATTTTTCAGCATTAAGG  
Bur  
.....G.....

15930 15850 15860 15870 15880 15890 15900 15910 15920







17460 17380 17390 17400 17410 17420 17430 17440 17450  
Col  
CGCTTCTATGCTTCGAGCTTCTCTATCCGATTGGAGAAGAAAGGTAAAAACGATAAACCCCTATAAAAGTCTTAAACCCTTTGTTTTGT  
Bur  
.....

17550 17470 17480 17490 17500 17510 17520 17530 17540  
Col  
ACATATGTAAATTGGGGAAAATTTTGTAGGGAAAGAAAGGAGTTTGGTTAAAGTTACCTGTGGAACAATCAGAATTAGTCCCAATAGC  
Bur  
.....

17640 17560 17570 17580 17590 17600 17610 17620 17630  
Col TATAAGGTAAG-  
CAATAAGAAAATGGTTCCTTGATCTTGTGTTGATAAAGCAGAGATTGTATTGCAAGTTAATGATTTTTTGTGGATTG  
Bur  
.....AA.....G.....  
Snp K60

17730 17650 17660 17670 17680 17690 17700 17710 17720  
Col  
ATTTTGCAGGAAGGTTTTGAGTATCATCATGCAGAGAAAGGATATGTAATGTTAACATATTGGATACCAGAGGAGGAACCTAGTATGCCTT  
Bur  
.....A.....  
Snp K59

17820 17740 17750 17760 17770 17780 17790 17800 17810  
Col  
CCTGCAATGCTTCACATCAAGTTGGTGTGGAGGTTTTGTATTAAATCAACATAAAGAGGTATCAATATATGAATGATTATTCTCTCAA  
Bur  
.....  
CLG8clonage 8R

17910 17830 17840 17850 17860 17870 17880 17890 17900  
Col  
GTCTCAACACTTAAAGTAGAGTAGGTAAAAGAAAGGTTACCTGAATTTTTTTTTAAATCTCATTAGGTGCTTGTGGTACAAGAAAAGTA  
Bur  
.....T.....

18000 17920 17930 17940 17950 17960 17970 17980 17990  
Col  
TTGTGCTCCTTCGATTACTGGTCTATGGAAGTTACCAACAGGGTTTATTAAATGAATCTGAAGAGATTTTCTCTGGTGCTGTAAGAGAAGT  
Bur  
.....A.....C.....

18090 18010 18020 18030 18040 18050 18060 18070 18080  
Col  
CAAGGAAGAAACTGGGGTAATTAATCCGAGAAGATTAGTATATAGTATAAATCTTGATTCTGTTAAAAATTCGCAAGATCATAACCAT  
Bur  
.....

18180 18100 18110 18120 18130 18140 18150 18160 18170

Col  
GTATGGCATTGTTGTTGTTATTTCAGGTAGATACAGAGTTCTCAGAGGTTATAGCTTTCAGACATGCTCACAAACGTTGCATTTGAGAAAT  
Bur

18190 18200 18210 18220 18230 18240 18250 18260  
18270

Col  
CTGATCTGTTCTTCATCTGTATGTTGAGACCCTCTCTGATAAGATAAATCATCGATGCTCTTGAGATCAAGCCGCAAAGGTAATGTAA  
Bur

18280 18290 18300 18310 18320 18330 18340 18350  
18360

Col CAA-GAGTCTTTATTAGAAATGCTCCAGTTGTACATGCTACAAGACGGTCTTGATTACAAATGATTGTTGTTTTT-  
CAGTGGATGCCATT  
Bur

T..A.....C..G.....T.....

18370 18380 18390 18400 18410 18420 18430 18440  
18450

Col  
GGCTGAATTTGTGGAGCAACCGATGATAAGAGGAGACAAAATGTTTAAAAGAGTGATTGAAATATGCGAGGGGAGATTAAGCCATCGGTA  
Bur

.....G.....G.....C.....A.....

18460 18470 18480 18490 18500 18510 18520 18530  
18540

Col  
TGCGGTCTTTCTCCTCATCGACTTGTCTCTACTTTTGATGGCAAACCTTCTTCTCTATTACAACGTTGTTGATGATGATCATGATCC  
Bur

18550 18560 18570 18580 18590 18600 18610 18620  
18630

Col  
TTCCCACTCCAAATTGTAGCACTGAGTTTATAGATAGACGGGTAAAACAGAACCAAATCAAGTGGTTCGATTCTGTATATACTTATTCTC  
Bur

End At5g47240 ->

18640 18650 18660 18670 18680 18690 18700 18710  
18720

Col  
ATGTAATGTATGTTGTTATTTGATACTCTCTTCAGTATAGTAAATAGTAATAGATCCTCTGCAAAATCCATGTAGCATCGAACCGGTA  
Bur

18730 18740 18750 18760 18770 18780 18790 18800  
18810

Col  
CTCTCAGTAGACTATACAATAAAAAGACTCTGTTCAAATAAATAACCGGTGGGTC AACCAAGTTTAAACAATATTCAAACCTTTGGACTG  
Bur

18820 18830 18840 18850 18860 18870 18880 18890  
18900

Col  
ACATATTCAACGCATATAATATAATGTAAACCAAGTTGTAATTTTAATTCATAGAAGAAGACATTATTGCAATGGACTAATTCAACTAAA  
Bur

```

.....
18990      18910      18920      18930      18940      18950      18960      18970      18980
.....
Col
CCAAGCTAGCCAAACATGTCGAAGATCCGTGCAAAATATCTGCTTCTCTCTCAAACCCCTGAGCACAATAGATAACATACAATTGTGGTGG
Bur
.....

19080      19000      19010      19020      19030      19040      19050      19060      19070
.....
Col
AACATGGAAACGTTTTTCAGGAATTTGACAAGACAAAACAAATGACAAGTTGTGGAAACATACAAGAAATAGAACGTTACGGGACAAAAGTG
Bur
.....

19170      19090      19100      19110      19120      19130      19140      19150      19160
.....
Col
ACAGGAAAAAATAGCTCTTGCCCTCCTCCACTATCCCATTTCAAAGCCTTATATATGAGATCATCATCGATTTTCTTATAATGGACGTTGA
Bur
.....
End At5g47250 ←
.....

19260      19180      19190      19200      19210      19220      19230      19240      19250
.....
Col
TGAAGATTCGGGCAGTTTTCTATATCGACTTTGTTTCAGCTTCAGTTTTGGAAAAGAGACTTGACTCCCATAGATGCTTCCCTAGTTCCCTTC
Bur
.....

19350      19270      19280      19290      19300      19310      19320      19330      19340
.....
Col
AAATAATGTAGACGAAGGACTTGTAGCTCTTGAAAAGGATCAACCCCAACACCTTGAGCTTTCCTTTGTTTATTAATCTGTCACTTTA
Bur
.....

19440      19360      19370      19380      19390      19400      19410      19420      19430
.....
Col
GGCGAGGATTCACGCTTAGAGACTCGAGATTTGCAGCATACATCAGCCATGTCAAATCCTTTAGATGTATGCATGAGTTTATTACCACA
Bur
.....
C
  Snp_K61
.....

19530      19450      19460      19470      19480      19490      19500      19510      19520
.....
Col
GCTGAGAGATCCTTGAACCATGGATTGCTTGGAGTGATTTCACTGGATGATGTGGATGGAGAATACTGGTCTCTTCTTACCTTCCCAT
Bur
.....

19620      19540      19550      19560      19570      19580      19590      19600      19610
.....
Col
TCTGTTCCCGACTCTGTGATATCGCAGTTTACCATTTCAAGTTTGTGGAGACTACTCAACGTACCAATGGCTGCAAAATGATACCTTAAGT
Bur
.....
C.....T...G.....

19710      19630      19640      19650      19660      19670      19680      19690      19700
.....

```

Col  
CCTTCTAGATATATACCCCTGCGTCATCCCTGCCAATCTTGCTTCCTAGAACTCTTCCAAAACAGAATCGTTATTACAGTAACGGTC  
Bur  
.....A.....G.....

19800            19720            19730            19740            19750            19760            19770            19780            19790

Col  
AAAAGTTGTAAACCCCTTCAACTGCTCCAAGATCTTGAGCAAGCAGCAATCTAATGCAGCAGCAGAACCATAAAATCTGAGAACCTGCAAC  
Bur  
.....T.....

19890            19810            19820            19830            19840            19850            19860            19870            19880

Col  
TTTTGTAAATCTGAAATCAGACCGACGCTTCGAAGATTGGAAGTGGACTCCAAATCAAGTGAATCAATTTACTCAAGACTCCTAAACCT  
Bur  
.....

19980            19900            19910            19920            19930            19940            19950            19960            19970

Col  
TCGGGCAGATGCTTTATACTCGTCCCTGATAAGTTGAGAGCCGCAAGAAACCAACGCCGAGATTCCTTTGGCAACTCGGTGATTTGG  
Bur  
.....

20070            19990            20000            20010            20020            20030            20040            20050            20060

Col  
AAGTTCCAAAGATAGATCCAAAACACCAGAGTCGACATGACCAGAAAGAAATTTACCAACAATATCTACC AACCTGTTATTTGAAAGAAC  
Bur  
.....

20160            20080            20090            20100            20110            20120            20130            20140            20150

Col  
AAGGTTACAAGATTTGCTGGTCAGGAAATTCAGGATCGTCTGGTATGTCTTAAATCTCATTGTTGAACAGAGACATCTTGTTCACAGTT  
Bur  
.....

20250            20170            20180            20190            20200            20210            20220            20230            20240

Col  
GTCCAATCGGTGACATCAGGCAGTTGGCTTAAACCCAGCATCTGTTTTCAACATATCTTCTCCATCCCTAAATTCAGATACTATCCAC  
Bur  
.....

20340            20260            20270            20280            20290            20300            20310            20320            20330

Col  
AATGCCATATCACGGATCATATCATGCATATACACTTTCTTATTAGACTCTAATAACCAACCTGCCCAACAAGATTATCGATGATCTCA  
Bur  
.....

20430            20350            20360            20370            20380            20390            20400            20410            20420

Col  
TAGCCCTCGATCTTTGCTCTCTCTTTCCGTCCTTTTTCATCTATGAAACCCCTCACCTATCCAATACTCTACCAGCTCATCTTGTTTGATA  
Bur  
.....



```

.....|.....|.....|.....|.....|.....|.....|.....|.....|.....|.....|.....|.....|.....|.....|.....|
Col
AACATTCTGTTTTCATCTTTCTAAGACTTTCCTCAAGCTCTTTCAAGCGTCGTATCAAGACCGACTGTTTGTTGGCAAAGTCTCACTTCT
Bur
.....|.....|.....|.....|.....|.....|.....|.....|.....|.....|.....|.....|.....|.....|.....|.....|

```

21330 21250 21260 21270 21280 21290 21300 21310 21320

```

.....|.....|.....|.....|.....|.....|.....|.....|.....|.....|.....|.....|.....|.....|.....|.....|
Col
ACCACAGGAGGAGGAGGTTGCTCAGTCACCTTCTTGAAATCTTTACCGGAGAGACTTTTAACTTCAGTCAACTTCTTGAATACCTTCTCG
Bur
.....|.....|.....|.....|.....|.....|.....|.....|.....|.....|.....|.....|.....|.....|.....|.....|

```

21420 21340 21350 21360 21370 21380 21390 21400 21410

```

.....|.....|.....|.....|.....|.....|.....|.....|.....|.....|.....|.....|.....|.....|.....|.....|
Col
CCTAGGTTGCAGGTTGAGAACCAGCACCAGATGTTGACAGACGTCGACGTACAGCTGAAGCATCTGAGAAGAAGCATCCCGAGCGGAC
Bur
.....|.....|.....|.....|.....|.....|.....|.....|.....|.....|.....|.....|.....|.....|.....|.....|

```

21510 21430 21440 21450 21460 21470 21480 21490 21500

```

.....|.....|.....|.....|.....|.....|.....|.....|.....|.....|.....|.....|.....|.....|.....|.....|
Col
GCAACATCCATTAAGTGTGGTGTCTTCTCAATGATTTTCGACTTGTAAGCCACGTAGCCACTATAGCTAGCCGTTGACCACCCCTTA
Bur
.....|.....|.....|.....|.....|.....|.....|.....|.....|.....|.....|.....|.....|.....|.....|.....|

```

21600 21520 21530 21540 21550 21560 21570 21580 21590

```

.....|.....|.....|.....|.....|.....|.....|.....|.....|.....|.....|.....|.....|.....|.....|.....|
Col
AGCTCACCAAGCATGACTCTGTTTACAACATCTCTTTTTCTGCTTTAAGCTCATCAAAGCACTCTTCAACAAGACAAGATTTTCCTTC
Bur
.....|.....|.....|.....|.....|.....|.....|.....|.....|.....|.....|.....|.....|.....|.....|.....|

```

21690 21610 21620 21630 21640 21650 21660 21670 21680

```

.....|.....|.....|.....|.....|.....|.....|.....|.....|.....|.....|.....|.....|.....|.....|.....|
Col
AACATGCAAAATGTACCCACCTTACACACAAGTAAGACAAAGCAGACTTATAACATGGCTCAACTACCTGCCAACAGCAATTCATTTGTG
Bur
.....|.....|.....|.....|.....|.....|.....|.....|.....|.....|.....|.....|.....|.....|.....|.....|

```

Start At5g47250 ←

21780 21700 21710 21720 21730 21740 21750 21760 21770

```

.....|.....|.....|.....|.....|.....|.....|.....|.....|.....|.....|.....|.....|.....|.....|.....|
Col
CTCAAGATTGAGAAAGAGAACTAAGATGAGAGTAGCAAAATTTAAACAGATCTTTGTACAGAACAGGATGTCTGAATCGGGGAGTAGAA
Bur
.....|.....|.....|.....|.....|.....|.....|.....|.....|.....|.....|.....|.....|.....|.....|.....|

```

21870 21790 21800 21810 21820 21830 21840 21850 21860

```

.....|.....|.....|.....|.....|.....|.....|.....|.....|.....|.....|.....|.....|.....|.....|.....|
Col
ATAGGGAACAGAACTTTGTGCAGGACGAAGTAGAGAGACCAGAGAAAAGGAGAGACCCAGAGAAATGGAGAGATGATGAAAGAAGAAA
Bur
.....|.....|.....|.....|.....|.....|.....|.....|.....|.....|.....|.....|.....|.....|.....|.....|

```

21960 21880 21890 21900 21910 21920 21930 21940 21950

```

...|...|...|...|...|...|...|...|...|...|...|...|...|...|...|...|...|
Col
ATAAATGGAGAGAGGAAAAGAACTAGAGAAAAAGTTATGTGGAATGCCTTTAATATCCCTACCCACCCGCATGTTGTAGAATTTTGTG
Bur
.....

22050          21970      21980      21990      22000      22010      22020      22030      22040

...|...|...|...|...|...|...|...|...|...|...|...|...|...|...|...|
Col
AACAACTATGATGACTAAAAGGTGACTGTGTCTGTGTGGTAGGTAACTTATTGGTTCATTGATTTACAAATCCATATATAAATTACGCA
Bur
.....

22140          22060      22070      22080      22090      22100      22110      22120      22130

...|...|...|...|...|...|...|...|...|...|...|...|...|...|...|...|
Col
ACATGTGCTAAGATATTGACGTGGTGGTGTCTCAGCTAAGAGCAAATATTGGTTCACCTGATTAATAAAATTCATATGGGTGTGAACCTCAT
Bur
.....

22230          22150      22160      22170      22180      22190      22200      22210      22220

...|...|...|...|...|...|...|...|...|...|...|...|...|...|...|...|
Col
ACATAGAAATAATGGTTGTTCTTAAATTTAAAAACATCCACAAAACAGGTTAGACAAACAAAAATGACTAACAAAGCATAAACGAATA
Bur
.....

22320          22240      22250      22260      22270      22280      22290      22300      22310

...|...|...|...|...|...|...|...|...|...|...|...|...|...|...|...|
Col
CTATATGTCCACCAACCATATGCAAAACGAAAGAAAAACAATGAAATCCATGAATAAAGATTTATAAAATGAAAGATCCACAAAAGTA
Bur
.....

22410          22330      22340      22350      22360      22370      22380      22390      22400

...|...|...|...|...|...|...|...|...|...|...|...|...|...|...|...|
Col
TACCACAAGCCACGTAACCTCCCATATGCATTAACAATATCAAAATTTAAATTTCAAATAGTAACCAAAAAATTTCAATTTGTAACCAAAA
Bur
.....

22500          22420      22430      22440      22450      22460      22470      22480      22490

...|...|...|...|...|...|...|...|...|...|...|...|...|...|...|...|
Col
AATCAAAATTAATAATTTAAAAGGGAAGGGCAATATTGTCAACCCACAAAGCCAAAGGGGAAGTGGCTGAAAAATTCAGTCTCAATTCAG
Bur
.....

22590          22510      22520      22530      22540      22550      22560      22570      22580

...|...|...|...|...|...|...|...|...|...|...|...|...|...|...|...|
Col
TTGACTCCTAAACACACAAAATGGGAAATAAATTTCTCAGTTGAACTCCATCTTTGGCGCCGTTCTGTGTGGGAAACGCAAGTATTAT
Bur
.....

                    T..
                    Asn/Tyr
                    → Start At5g47260
                     Snp K63

22680          22600      22610      22620      22630      22640      22650      22660      22670

...|...|...|...|...|...|...|...|...|...|...|...|...|...|...|...|

```

Col  
ACAACCTGGAGAGAACTCTAGAGGCTTTGCATAAAGTAAATGCAAGACCTCAACGCAATGAGAAACGATCTGTTGAAGAGGCTGTGCGAAAG  
Bur

.....  
22690      22700      22710      22720      22730      22740      22750      22760  
22770

....|....|....|....|....|....|....|....|....|....|....|....|....|....|....|....|....|....|....|....|....|....|....|  
Col  
AGGAGGAGATAGGCTCTACAAGGCTACAAGAAGTCAAAGAGTGGATTTCAATGGTGAAGAGATTGAACCTAAAGCCAATCGGCTGCTTG  
Bur

.....  
22780      22790      22800      22810      22820      22830      22840      22850  
22860

....|....|....|....|....|....|....|....|....|....|....|....|....|....|....|....|....|....|....|....|....|....|....|  
Col  
ATGAAAGTGTCTCTGAAATTCAGAGACTATCAAGGTACGGCTATTGTTCTCTGATCCCTGCGTCGACCTATCGTTACAGTAAAAAGGTAC  
Bur

.....  
22870      22880      22890      22900      22910      22920      22930      22940  
22950

....|....|....|....|....|....|....|....|....|....|....|....|....|....|....|....|....|....|....|....|....|....|....|  
Col  
TTACGACTATGGAAGGAGTTGAACTCTGAGATCTAAGGGAGTCTTCGAAAGCTGTCGTTACAGAGCTCTTCGGCCTCTTGATTAAGA  
Bur

.....  
22960      22970      22980      22990      23000      23010      23020      23030  
23040

....|....|....|....|....|....|....|....|....|....|....|....|....|....|....|....|....|....|....|....|....|....|....|  
Col  
TGCTCCAATTCAACTTACTGTTCTCAAGCAAAAGTTGCTTGATACGGCATGGGCTCGTCTAATGGACATAAATGTTGGGACTTTGGGTA  
Bur

.....  
23050      23060      23070      23080      23090      23100      23110      23120  
23130

....|....|....|....|....|....|....|....|....|....|....|....|....|....|....|....|....|....|....|....|....|....|....|  
Col  
TTATGGTAGGGTGGAGTAGGCAAAACCCCTTCTTACTAACTCAGAAACAAGTTACTTGTAGATGCATTTGGTCTTGATCTTTG  
Bur

.....  
23140      23150      23160      23170      23180      23190      23200      23210  
23220

....|....|....|....|....|....|....|....|....|....|....|....|....|....|....|....|....|....|....|....|....|....|....|  
Col  
TTGTTGTGGGTGTTGAAGAGGTCGAGAGCATACAGGATGAAATGTTGTTAAAGAATTAGGCCTCCAATGGAGAAGAGAAACCAAGAGCGCA  
Bur

.....  
23230      23240      23250      23260      23270      23280      23290      23300  
23310

....|....|....|....|....|....|....|....|....|....|....|....|....|....|....|....|....|....|....|....|....|....|....|  
Col  
AGGCAGCTGAAATATTGGCAGTCTTAAAGGAGAAGAGATTTGTTGTTACTGGATGGCATAACAGAGGGAATTGGATCTTGAGGAAATTC  
Bur

.....  
23320      23330      23340      23350      23360      23370      23380      23390  
23400

....|....|....|....|....|....|....|....|....|....|....|....|....|....|....|....|....|....|....|....|....|....|....|  
Col  
GAGTTCTTTTCCCAGCCGAGATAATGGATGCAAAATTTGATTCACTCAATCTCTGGAAGCATGTGACGAAAGCAAGTGGGTGATG  
Bur

.....





**GGATCTCAGGTGCTTTCTTCAGTGGATGACAGGACTTAGTCTTGGATCTATCATTAAATAGAGAACTTGCTGAGTTGCCGGAAGAAG**  
**Bur**

.....

24300            24220            24230            24240            24250            24260            24270            24280            24290

....|...|...|...|...|...|...|...|...|...|...|...|...|...|...|...|...|...|...|...|...|...|

**Col**  
**TTTCAAGCCTGGTGTGCTGCGGTTTCTCAACTTATCATGGACATGTATAAAAGGATTGCCCTTGGTTTAAAAGAGCTTAAGAGTTGA**  
**Bur**

.....

24390            24310            24320            24330            24340            24350            24360            24370            24380

....|...|...|...|...|...|...|...|...|...|...|...|...|...|...|...|...|...|...|...|...|...|

**Col**  
**TACACTTGGATTTGGATTACACATCTAACTTCAAGAAGTTGACGTGATAGCAAGTTTATTGAATTTGCAGTACTGAGATTATTTCATT**  
**Bur**

.....

24480            24400            24410            24420            24430            24440            24450            24460            24470

....|...|...|...|...|...|...|...|...|...|...|...|...|...|...|...|...|...|...|...|...|...|

**Col**  
**CTGTTTCTATGGATCTCAAGTTAATGGAGGATATCCAACTTTTGAAGGCCTGAAAGAGTTGAGTCTAACAGTGAGAGGATCTTCTGTTT**  
**Bur**

.....

24570            24490            24500            24510            24520            24530            24540            24550            24560

....|...|...|...|...|...|...|...|...|...|...|...|...|...|...|...|...|...|...|...|...|...|

**Col**  
**TGCAGCGGTTACTAAGTATCCAGCGATTAGCAAGTCTATCCGACGTTTACATCTAACTGAAACTACAATAGTCGATGGAGGAATATTAT**  
**Bur**

.....

24660            24580            24590            24600            24610            24620            24630            24640            24650

....|...|...|...|...|...|...|...|...|...|...|...|...|...|...|...|...|...|...|...|...|...|

**Col**  
**CGTTGAATGCTATATTCACTTCTTGTGAGCCTTGATATTTTGGGATGTAATATCCTGGAGATAACCAATTGATTGGAGATGCACCATCCAAA**  
**Bur**

.....

24750            24670            24680            24690            24700            24710            24720            24730            24740

....|...|...|...|...|...|...|...|...|...|...|...|...|...|...|...|...|...|...|...|...|...|

**Col**  
**GGGAAAATAATTCTTCAATCCAGAACATACGCACAATGACTATTTCATCGGTGCCAATACTTAGAGACTTGACATGGTTGCTATTAGCCC**  
**Bur**

.....

24840            24760            24770            24780            24790            24800            24810            24820            24830

....|...|...|...|...|...|...|...|...|...|...|...|...|...|...|...|...|...|...|...|...|...|

**Col**  
**CGTGTCTTGGTGTAGCTAAGTGTTACTGAAATGTCGCAAAATGGAAGAAGTAATAAGCAAAGATAAAGCTATGGCCAAAGCTGGGTAATACGA**  
**Bur**

.....

24930            24850            24860            24870            24880            24890            24900            24910            24920

....|...|...|...|...|...|...|...|...|...|...|...|...|...|...|...|...|...|...|...|...|...|

**Col**  
**GTGAGCAGCCCTTCAAATCTAACTAAGCTCGTCTTAGATGGTTTACCTAAACTGGAGAGCATCTACTGGACTCCTCTACCTTCCAG**  
**Bur**

.....

24940            24950            24960            24970            24980            24990            25000            25010

25020

Col  
TTCTGGAAATATTTAGTGATAAGGCGTTGTCCAGAGCTGAGAAGACTTCCATTCAACTCTGAGAGCACTATAGGAAATCAAGTTGAAACGA  
Bur

25030 25040 25050 25060 25070 25080 25090 25100

25110

Col  
TAAATTGAGGAGCAAGTGATAAAAAATAGTTGAATGGGAGGATGAAGCTACAAAACAACGTTTCTCCATTTCAATAACAGGTATCTTCTTC  
Bur

25120 25130 25140 25150 25160 25170 25180 25190

25200

Col  
CTTATCCACATTTCTTCTCTATTTTTTTTCGATAAGGTTTCTTAAATCTATAAAAGCTTGGCCATGAATAACTAGCATCTCCACGGG  
Bur

25210 25220 25230 25240 25250 25260 25270 25280

25290

Col  
AATGTCACCTACCATCTCTTAATTTTTTATATATTTCAATGTCACCTTATTATTTCATAGAATCTGGAAAGCTGATTTGATAAGATTTT  
Bur

25300 25310 25320 25330 25340 25350 25360 25370

25380

Col  
GCAATGGTGATCCCTTATTTTGATTGATCATTTGTTTTCGAATTATGTAAACAAACGAACGGAGTGCAGAGACTTTGTACAGATGGCTGAA  
Bur

25390 25400 25410 25420 25430 25440 25450 25460

25470

Col  
GATCCGAAGATGGATGGTTTGACATCGGAGTCACATCCAAATTCAAACCATAGACCTGGTCGGGACTACAGGAAGTGGAGAAACTGCCACT  
Bur

25480 25490 25500 25510 25520 25530 25540 25550

25560

Col  
GCAACCAACATCCAAGGAAGAAGGTGGTCCAAATCGGGAACACACGCAACTGTTGTTACCATGGAATGCCAGACATATAAAGTTTTCACA  
Bur

25570 25580 25590 25600 25610 25620 25630 25640

25650

Col  
CCAGATTGCCCATCAACAATATGATTGACACTCCTGGTACGAATTTCCTTTTATGTTATACCTAACTAAATTATCATGCGTGGGAAGAA  
Bur

25660 25670 25680 25690 25700 25710 25720 25730

25740

Col  
AAAAACAAATTTTCTAATAAGTAAGGTTTGTACTTTACGTATACAATTAGAATAGGATCCACGTAAAAATGTTATTTCTAATTTTCTAT

Start AT5TE69050→

End At5g47260→

Bur

.....

25830                    25750          25760          25770          25780          25790          25800          25810          25820

....|....|....|....|....|....|....|....|....|....|....|....|....|....|....|....|....|  
Col

A TAGTTTAAAATTAAAAAGTGC AAAACTAATAATGCTGAACCAAATATTATAATGTATATAACTATCAATACTATTTTCAATTATATAA

Bur

.....

25920                    25840          25850          25860          25870          25880          25890          25900          25910

....|....|....|....|....|....|....|....|....|....|....|....|....|....|....|....|....|  
Col

TTGATATGATTTTGTGTCACTACCATACGCATATGACATATATATTTATTATTTATATGAACCAAACCTCATTTCATTAAACTAGTGAC

Bur

.....

26010                    25930          25940          25950          25960          25970          25980          25990          26000

....|....|....|....|....|....|....|....|....|....|....|....|....|....|....|....|....|  
Col

TAAA GTTTACTTTGCTC AAAAGAGTTGATTTAAACGTTTT CAAAACCCATCCGGACGTAAAATGTGTAATGGAACATACATAGAGA

Bur

.....

→ End At5TE69050

26100                    26020          26030          26040          26050          26060          26070          26080          26090

....|....|....|....|....|....|....|....|....|....|....|....|....|....|....|....|....|  
Col

CCAAATAATTATAAATTTATAATAGATAATGCTTCTATGTATATGTATGTTGTATGTAAGATTACGTCATCTCAGGTGAACATATGTTG

Bur

.....

26190                    26110          26120          26130          26140          26150          26160          26170          26180

....|....|....|....|....|....|....|....|....|....|....|....|....|....|....|....|....|  
Col

AGTTTTTGATATTGAACACTGGTTAAAAGTCATTGAGACTGTGCTCTGTATGCTAGAAAGTCCTTCATTTGATGCTAAAAGACTTTGGG

Bur

.....

26280                    26200          26210          26220          26230          26240          26250          26260          26270

....|....|....|....|....|....|....|....|....|....|....|....|....|....|....|....|....|  
Col

ATCCGAGTTTCTTTCTGACTGTGTCAATTTTCTGACTTTGGGAACTGGATTTAGGC AAGAGGAAGGTGAAGGAGATGCTTTTAAATTT

Bur

.....

Start At5g47280 →

26370                    26290          26300          26310          26320          26330          26340          26350          26360

....|....|....|....|....|....|....|....|....|....|....|....|....|....|....|....|....|  
Col

GACCGATGAGGCAAGAATTATTGGGATCTCAGGGATGATCGGTT CAGGGAAAACCATTCTTGCCAAGGAGCTTGCCGGGACGAGGAGGT

Bur

.....

26460                    26380          26390          26400          26410          26420          26430          26440          26450

....|....|....|....|....|....|....|....|....|....|....|....|....|....|....|....|....|  
Col

CCGAGGTAATCAGTTTGCCTTTGTTATGTCTGAAACTATCCATTGTTAATAATGCTTGGCCATCTTTGAAGTC TTTTGAGCAGTTTAT

Bur

.....

26550                    26470          26480          26490          26500          26510          26520          26530          26540



.....  
27360 27280 27290 27300 27310 27320 27330 27340 27350  
.....  
Col  
TCTCGATCCAAAAACCAAGAGTGTTCCTTGGATATGGGTGCTTCCCTGAAGGCAAGAAAATCCCTGTTGATGTTCTCATCAACATGTT  
Bur  
.....  
27450 27370 27380 27390 27400 27410 27420 27430 27440  
.....  
Col  
GGTCAAGATACATGATCTTGAGGACGCAGCCGCTTTGATGTTCTTGTGATCTAGCAAATAGGAATCTCTTACTCTCGTAAAAGATCC  
Bur  
.....  
27540 27460 27470 27480 27490 27500 27510 27520 27530  
.....  
Col  
AACGTACGGTTATAGAACTCTTATGTTCTCATCTCTTGTAGCCACTTTTATAATTTTAAACCATTCTTAACATAATTACCCTGGATAATG  
Bur  
.....  
27630 27550 27560 27570 27580 27590 27600 27610 27620  
.....  
Col  
TTGCAGGTTTGTGCTATGGGCAGTAGCTACTATGATATATTCGTGACGCAGCAGCATGTTTTAAGAGATGTAGCACTTCATCTTACCAA  
Bur  
.....  
27720 27640 27650 27660 27670 27680 27690 27700 27710  
.....  
Col  
TCGTGGAAAAGTAAGTAGAAGAGACCGCTTATTGATGCCAAAAAGAGAGACCATGCTTCCCAGCGAATGGGAGAGGAGCAATGATGAGCC  
Bur  
.....  
27810 27730 27740 27750 27760 27770 27780 27790 27800  
.....  
Col  
ATACAATGCACGAGTGGTTCCATTCACACAGGCAAGAATTTGTTATGCAACGATCTTCTAATGAATTAATTCCGGTTCCTCACTAGAATC  
Bur  
.....  
27900 27820 27830 27840 27850 27860 27870 27880 27890  
.....  
Col  
ATAAGGTATTAATATGGATTTCTTACAGGAGAAAAGACTGAGATGGACTGGTTTGACATGGAATTTCCCAAGGCAGAAGTTCTGATAGT  
Bur  
.....  
27990 27910 27920 27930 27940 27950 27960 27970 27980  
.....  
Col  
AAACTTCTCTCAGACAACATATGATTTGCCCTCCTTTCATTGCTAAGATGGGAATGCTTAGGGTCTTCGTGATTATAAACCAACGGTACCTC  
Bur  
.....  
28080 28000 28010 28020 28030 28040 28050 28060 28070

Col  
TCCAGCGCATCTACATGACTTCCCCATCCCTACCAAGTTTGACCAATCTAAGGAGTCTCTGGCTTGAGAGGGTTCATGTCCCTGAAGTCTC  
Bur

28090 28100 28110 28120 28130 28140 28150 28160

Col  
TAGCAGTATGATACCCTTGAAAACCTCCACAAGCTATATCTGATTATTGCAAGATCAATAACAGTTTTGATCAGACAGCCATAGACAT  
Bur

28180 28190 28200 28210 28220 28230 28240 28250

Col  
TGCCCAAATCTTCCCAAATGACTGATATCACAAATAGATTAATGCGATGATCTTGCGGAACACCTTCGACCATCTGTGAATAACCTC  
Bur

28270 28280 28290 28300 28310 28320 28330 28340

Col  
TCTCAACTCCATCAGCATAAACAAATGTCCCAACATCAAGGAGTTACCGAAGAATAAAGTAAGCTACAGCCCTTCAACTTTGAGGCT  
Bur

28360 28370 28380 28390 28400 28410 28420 28430

Col  
ATACGCTTGCCCAGAGCTAAAATCTCTGCCTGTGGAATCTGTGAATGCCAAGACTAGTGATGTCGACATCTCTCACTGTCTCAGCCT  
Bur

28450 28460 28470 28480 28490 28500 28510 28520

Col  
AAGTTCTCTTCCGAAAAGATAGGAAATGTAGGCACCTTGAGAAAATCGACATGAGAGAATGTAGCTTATCGAGCATACCAAGTTCGGC  
Bur

28540 28550 28560 28570 28580 28590 28600 28610

Col  
AGTTTCATTGACTTCCCTATGCTATGTAAACATGCTATAGAGAGGCTTTTGGATGTGGAAGAGGTTGAGAAGGCAGTTCCCGGACTTCG  
Bur

28630 28640 28650 28660 28670 28680 28690 28700

Col  
TATTGAAGCTACTGAAAATGGTTCAACTAGACTTGCCCGACGAGTAGTATAGTTCTTAATTCCTCCCGAGCTTTTGAATGCATGT  
Bur

28720 28730 28740 28750 28760 28770 28780 28790

Col

End At5g47280 ->

TGTATTATTATTATTAACACTCGATTAGGACCCCTGTATGATATACGATTTTATTAATACATGTTTGCTCTTATAACGTC AATATATAAA  
Bur  
.....  
28890            28810            28820            28830            28840            28850            28860            28870            28880  
.....|.....|.....|.....|.....|.....|.....|.....|.....|.....|.....|.....|.....|.....|.....|.....|.....|.....|  
Col  
TTATATGTTGATTTAAGTATTAAAAGTTTCTATTGGGAATCTCAAAGATATGTTTTAAAGATTCACCTATAAGTAATAACAAACAAC  
Bur  
.....  
28980            28900            28910            28920            28930            28940            28950            28960            28970  
.....|.....|.....|.....|.....|.....|.....|.....|.....|.....|.....|.....|.....|.....|.....|.....|.....|.....|  
Col  
AAAAACTATTTAGCTTAATGGTAAAAAGCATGAGTCTATATAGAGAAGGGTTCATAATTTAAAATTAGTTGAATGTTGTTTATTAA  
Bur  
.....  
29070            28990            29000            29010            29020            29030            29040            29050            29060  
.....|.....|.....|.....|.....|.....|.....|.....|.....|.....|.....|.....|.....|.....|.....|.....|.....|.....|  
Col  
GTGAGATACATTTTAAAATAATTTAGTGAATAAAATAATCGTTAATATTATGTCATGTGCTGATTATTATATGACCAATTATATGACCCA  
Bur  
.....  
29160            29080            29090            29100            29110            29120            29130            29140            29150  
.....|.....|.....|.....|.....|.....|.....|.....|.....|.....|.....|.....|.....|.....|.....|.....|.....|.....|  
Col  
TCAATAGTTGTC AACATTTTC TGGTGGATCGACGAGGACGAACCCAATGATTTAGAAAACAGGGATGATATATAACAAGTAAGTATAGTC  
Bur  
.....  
29250            29170            29180            29190            29200            29210            29220            29230            29240  
.....|.....|.....|.....|.....|.....|.....|.....|.....|.....|.....|.....|.....|.....|.....|.....|.....|.....|  
Col  
GCAAGTGTCCCTGATCTATAGTCATAC AAGGT AAGGCCACTGCTGAAAAGAGAAGTGGCGGTGGATTTAAAACAATAC AAGTGAAGTA  
Bur  
.....  
29340            29260            29270            29280            29290            29300            29310            29320            29330  
.....|.....|.....|.....|.....|.....|.....|.....|.....|.....|.....|.....|.....|.....|.....|.....|.....|.....|  
Col  
GTGTATCGAGCCCTTGTAAACATGAGATTGTAATAGATCCAGTAAGAGATGGTAGATTTTAACTCTGAGATAAGAAACTATCTCTATTTG  
Bur  
.....  
29430            29350            29360            29370            29380            29390            29400            29410            29420  
.....|.....|.....|.....|.....|.....|.....|.....|.....|.....|.....|.....|.....|.....|.....|.....|.....|.....|  
Col  
GAAAATCAGAGAACTACTTTAGCAGGGGAGAGGGATGGGAGCTACCTCGAGGGCATTCAAGTTCCTTCAAAACTGGAGAACTCATCTTTGATTTG  
Bur  
.....  
29520            29440            29450            29460            29470            29480            29490            29500            29510  
.....|.....|.....|.....|.....|.....|.....|.....|.....|.....|.....|.....|.....|.....|.....|.....|.....|.....|  
Col  
GATATCAGAAAGAGAAGATATATCTATGGTATTAGTGGCTGAGACAAACGATTCCTCTCTCCCAAGGATCATTGGGACTGCCTTGGCCATC  
Bur  
.....  
29530            29540            29550            29560            29570            29580            29590            29600



29610

Col  
TGGACTGCAAGGTATAAACAGGAAGAAATAAAAAACAACAAAAATATCAAGGATATAGCACTACCAATATGATAAATGCATTGACAAAATC  
Bur

29620 29630 29640 29650 29660 29670 29680 29690

29700

Col  
AGTCTTTTAAGTACAAAAATACTTTGGTGAAGGGAAAACATAAAGGAAACTTGTGCTATTGAAGCGGACAAACAGCTACCCACACAC  
Bur

29710 29720 29730 29740 29750 29760 29770 29780

29790

Col  
CATTTGGGGGAATTTTGAGAAACAGATTTGAGACTTTTATTGTTGATAGTAACATATACATAATGCTCTAGCTTCTTCTTCTATGCC  
Bur

29800 29810 29820 29830 29840 29850 29860 29870

29880

Col  
ACGAATCAACAATATTGTCCATGCTATCAACAATACAAAATAATAGCTAAAACCCCAAAAATCATAAAACCTAAGCAACAAGCTAATCTTCT  
Bur

29890 29900 29910 29920 29930 29940 29950 29960

29970

Col  
TCAGTTTCAGAGCAAGAATCAAAATGTACAGTATTTAAAGAGCTAGACAGACTTTAACGTAGAGAAAAGAATCAATCTCCAGAGCCTT  
Bur

29980 29990 30000 30010 30020 30030 30040 30050

30060

Col  
CCTTAGTCATCTCTGCTTCCCTTTTTCATCTTCACGTAATGTTGGTTATGCGATTTAACCTGTTATGGATTCCTAGTCTTTACAAATT  
Bur

30070 30080 30090 30100 30110 30120 30130 30140

30150

Col  
CTCTAGATATGACCTCCCAAGCTCCTGGCCCTTCGACTTTAGTCCCTCAAGAAAGAGTCTGAAAACGTACACCAAAGTAAATGGATAAA  
Bur

30160 30170 30180 30190 30200 30210 30220 30230

30240

Col  
CAGATGAGAGATTTCATCATATGATCTATATTTACCAAAATAGCAACTTTAAACAATTAATGCCTAAGCAAAGCCAAAGCCTCCATCTAAC  
Bur

← End At5g47290

30250 30260 30270 30280 30290 30300 30310 30320

30330

Col  
ATTCATCATCTTAAATTAGCAAGAAGACAACCTTACTCGTTCCTTGGGCTGACCAACGAGTCCCTTCTTCGCCACTATCGGCGTCGCTG

Bur

.....

30420            30340        30350        30360        30370        30380        30390        30400        30410

....|....|....|....|....|....|....|....|....|....|....|....|....|....|....|....|....|....|....|....|....|....|

Col  
AACG**TGGTGAGTACTCGGGCACAA**CATCTCTG**CCGGATTCGATAACAGCA**ATATCTTGGAGCAGCTTATCGT**AGTGGTATTTGATCTCAT**

Bur

.....

30510            30430        30440        30450        30460        30470        30480        30490        30500

....|....|....|....|....|....|....|....|....|....|....|....|....|....|....|....|....|....|....|....|....|....|

Col  
CC**ACCGACGTTCTCATT**TGTGCAGCGATA**ATCTCCAGCTTTGCCGGCGAATCCGGGACTTGCACGAGTGCAACCTCGAAAGCTTTGTTC**T

Bur

.....

30600            30520        30530        30540        30550        30560        30570        30580        30590

....|....|....|....|....|....|....|....|....|....|....|....|....|....|....|....|....|....|....|....|....|....|

Col  
C**CTCCC**AAGTCCACTT**CATCGTACCAGCCATTGTAGCC**AAGAAA**GAAAGAAAAGAA**TTGAGAGAGAGAGAGAGAAAGAT**CGAGCGAGT**

Bur

.....

Start At5g47290←

30690            30610        30620        30630        30640        30650        30660        30670        30680

....|....|....|....|....|....|....|....|....|....|....|....|....|....|....|....|....|....|....|....|....|....|

Col  
G**TAA**CGACG**TGGAGTTGAA**CTG**TTACGTAAC**AAGAA**CTTTGCGATTTATATCTTTATACAGCAACA**CA**CA**TTAA**ACCAAGAA**AT**GAA**

Bur

.....

30780            30700        30710        30720        30730        30740        30750        30760        30770

....|....|....|....|....|....|....|....|....|....|....|....|....|....|....|....|....|....|....|....|....|....|

Col  
C**CA**AGAT**TACATCTTA**ATTA**ATTCATAA**ACCGGACAT**TC**CAGAG**CCCTTA**ACCGGA**ATTATATTAGTATATCACTATATACATGTTA**ATA

Bur

.....

30870            30790        30800        30810        30820        30830        30840        30850        30860

....|....|....|....|....|....|....|....|....|....|....|....|....|....|....|....|....|....|....|....|....|....|

Col  
A**TAG**CC**TTGATA**AAA**ATA**AG**CAAA**ACAGAT**TAG**CC**TTTAGTTT**TGACG**TCATGCATGC**ACT**TGTGGG**TCT**GTGAAA**AT**CTCG**CG**TTT**

Bur

.....

30960            30880        30890        30900        30910        30920        30930        30940        30950

....|....|....|....|....|....|....|....|....|....|....|....|....|....|....|....|....|....|....|....|....|....|

Col  
T**CTCG**TGGAAA**AGTGGATCG**CT**TACAAA**CC**CTCA**AGAT**ATCTTTTTTTTTTTTTCAACTTGAACCTCAAGGTATCTAAGCCTTTAA**CAA

Bur

.....

31050            30970        30980        30990        31000        31010        31020        31030        31040

....|....|....|....|....|....|....|....|....|....|....|....|....|....|....|....|....|....|....|....|....|....|

Col  
A**CTCT**CT**CTACGTTTT**ATA**ATCAAC**AGAAA**ATGTTAAA**ATA**AAA**CT**CAAA**T**ACAA**TT**AA**CA**TTATCAAA**CT**AGCC**AA**ATGTTA**

Bur

.....

31140            31060        31070        31080        31090        31100        31110        31120        31130









```

.....
34200      34120      34130      34140      34150      34160      34170      34180      34190
Col
GGTTTTTCTTCGATAAATTAGGGCTCCGATTTGTTACCCTTAGTTCATTTTCTCTAAATTTGGTTTTTGATTGATGGGTTTCT
Bur
.....

34290      34210      34220      34230      34240      34250      34260      34270      34280
Col
TGATTTAGCAATTTTAAGATTTACTTGAAAGATTCCGTAATTTGTTCTGATTCGGATTCCTTGATCTGTGCTCACTAGCTCTCTACCA
Bur
.....

34380      34300      34310      34320      34330      34340      34350      34360      34370
Col
AAGCAGCTTCCTTTTCTGATCCCTAGTGTCAATTAATGTGAACAGATTGTTACTTTAGCTTCTCTCCTTTTCACTTAGTTTTGCAGA
Bur
.....

34470      34390      34400      34410      34420      34430      34440      34450      34460
Col
GATTTTAGGAGGACATGATTGTTGAATTGGGAGAGACATTGGTTCGTAAAATGCGGGTGCCTGGTTTGAGCTCAAGCTTATGCTCT
Bur
.....
                                     → Start At5g47310
.....

34560      34480      34490      34500      34510      34520      34530      34540      34550
Col
GGTGAGGATAAGGAAGAAGAAGAGATTAATGGAGAAGGCTCTCTCACGCCTGTTTATCTCAACGCTATGATCTAACTCCTGTCACAAAT
Bur
.....

34650      34570      34580      34590      34600      34610      34620      34630      34640
Col
TATCTCTATTGGTTCGGCCTTGGCATAATTCACCTCTGGCATTGAGGGTAATGTTGGCTTCTTCTCTATTACTTACTTGACCTAACTAAAT
Bur
.....

34740      34660      34670      34680      34690      34700      34710      34720      34730
Col
TTTTCTTTGTCATTGCTTTCTATTGCTTTCAATCCATATCTGGTTTATCATGTTATCAAAGTACTTCTAGCCTTGAATAGGAACAATGAT
Bur
.....

34830      34750      34760      34770      34780      34790      34800      34810      34820
Col
ATTCCTCAATTGTTCTCCACAAGTTGTGATTTATTATTATTAGGTGAAAATGGTGTTTATTATATTAGCTATGGAATACATTATTAGAA
Bur
.....

34920      34840      34850      34860      34870      34880      34890      34900      34910

```





.....  
35730 35650 35660 35670 35680 35690 35700 35710 35720

Col  
GGAGAAGGATCGGATCATCATCTCATAACAGCACCAAAACAGCGATATTGCGTATCTACAGGACAGACCAGTGAGACTTGCCCGTGAGCTC  
Bur

.....  
35820 35740 35750 35760 35770 35780 35790 35800 35810

Col  
CTCCAAGAACCACCGATGATACATCTCCGCAGTACTTGTGAAGCGGTCCCTGATCATCACAAGCATCAACAACCTTGTGTGCTGTAA  
Bur

End At5g47310→

.....  
35910 35830 35840 35850 35860 35870 35880 35890 35900

Col  
CAGTGAGGCAATGGGTCCATATATTGAGTATTCCTTTGGATCTATAAGTGTAATAAAAGATTTAAGATTTAAATCAGAACCATCTGAGAT  
Bur

.....  
36000 35920 35930 35940 35950 35960 35970 35980 35990

Col  
GTTGGATTGTAGTGAAGATTTAGAGACAAATGGTGTGACAAAAATTGTGCCCTTCTTCTCCCAATGTGAGTTCACATTTAGTGTCA  
Bur

.....  
36090 36010 36020 36030 36040 36050 36060 36070 36080

Col  
TAATTCGTAAGATTTGCGAGACTAATAATTAGTTTTGATTTTTCTATTCAATTTACAGACAGTTAATGGTTATGGATTTTCAGACATTC  
Bur

.....  
36180 36100 36110 36120 36130 36140 36150 36160 36170

Col  
TTGTTCTCGGTTCACTCTTCGCAGCTATATTTTATTGGAGCGGTAACATAACTTATTGGGCTAGCCTGGGAAAAATAATTATACATTGG  
Bur

.....  
36270 36190 36200 36210 36220 36230 36240 36250 36260

Col  
GCCCATTAATTTAAATAACCTTCATCGGCCAGTTTGTGTGTAACAGTTATGATCAGATCCAGACCGTCCAAAAATAGGGAGGGGTGAC  
Bur

.....  
36360 36280 36290 36300 36310 36320 36330 36340 36350

Col TCTCGAACACGATGCTCTGAAGACTGAAA-----  
AGCGTAACCTTTTTTACCTGGCTAGGGTTCCTGGTCTGTTAACGGTACGTTCAA  
Bur

AAGAA

Polymorphism: 2017-C

36450 36370 36380 36390 36400 36410 36420 36430 36440

Col  
TGGTCTCTGTACTATCATTTCTGCCAAATGGGTCTTCTCTTTGGAGGCTAATCGACGTTGTGCTTAACTAAATGCTCTTTTAGGTTG  
Bur

36540 36460 36470 36480 36490 36500 36510 36520 36530

Col  
TTTAGAGGAATATATCACAGGTTTTC AATTAGATTGATCTGCTTAGTTTTGTAATCAGTG TAGGTTACCAGTGAATCATGAACCTCCGTT  
Bur

36630 36550 36560 36570 36580 36590 36600 36610 36620

Col  
AGGGTTATAAGCTCTCTGTTTCTTTCC TGACTTATCAATGTCAC TAAATTTAGATTGATGCGTAGTTTAGCTTTGAAGATCAGGGAAC  
Bur

36720 36640 36650 36660 36670 36680 36690 36700 36710

Col  
TGAATAATCTGGTTTAAGGAAGCTTTGAATTTCTGCTTGCCATGGACATTCGACTTATCAGTATTTTTGTACATTTTGGTTAATGTTT  
Bur

36810 36730 36740 36750 36760 36770 36780 36790 36800

Col  
ATCGAATTGGTTTGATCAGTCTGTGGATTTTAACTTTACAAGTTAAGATGCTATCTTTTAGGTTAGTTGATAGGTCATGGATTGTTG  
Bur

36900 36820 36830 36840 36850 36860 36870 36880 36890

Col  
TTATATGGAGTCTAGACATTTTGCCACTGCTTTAGTGTCTTAGCTTCTAAGGGTTTCGTTGATATATTGTACTGGGTTTATCGTTCCA  
Bur

36990 36910 36920 36930 36940 36950 36960 36970 36980

Col  
GGCATCTAGT **ATGGCTTTCTGCACTAAACTT**GGCGGTCACTGGAAACAAGGGTAAATGTTCCAGTGTCATCAATGCTCGGTTCTCTTCG  
Bur

→Start\_At5g47320

37080 37000 37010 37020 37030 37040 37050 37060 37070

Col  
CTACATGTCCACAAAACTTTATATTGGTGGTAAGTATAACTTCCATCAGATTGTTTCATTTCTTACTCTTCGCAGCTGTGGATGTTTT  
Bur

37170 37090 37100 37110 37120 37130 37140 37150 37160







.....  
39430 39440 39450 39460 39470 39480 39490 39500  
39510  
.....  
Col  
TCTGGATTATTGATTTCTTTGGTAGCTTATACTTCCATATGTTTCCTTATTTAAATTTTTCATTCCAATAATGGGACAAAGTTATAACAA  
Bur  
.....  
39520 39530 39540 39550 39560 39570 39580 39590  
39600  
.....  
Col  
ATAGTATTCGATATCAAACGTCAAAACATGTACTCCCAAATATATTTTATTGGAAATATAGTTTGGAGATATTTTACCTGGGGGAGAT  
Bur  
.....  
39610 39620 39630 39640 39650 39660 39670 39680  
39690  
.....  
Col  
GGAACCAAAATAGATCTAGAAATGTGATTGGCTAACGAAAGAAGCACAAATAGTTAACCAAGTGACAGTGACAAATTTATCCCTCGACAAC  
Bur  
.....  
39700 39710 39720 39730 39740 39750 39760 39770  
39780  
.....  
Col  
AACACACATTCACATATATCTTTTATTTTATTATTTTCTGTGTCTTTAAAGTTTACAGCACAAAGTAGTTTCTAAATCTTATAATCA  
Bur  
.....  
39790 39800 39810 39820 39830 39840 39850 39860  
39870  
.....  
Col  
ATTTTCAATTGATAAACAGAAATTTAAATATTTAAATAGACAAATAAATGATCAAATCTATATTTCTATACAAGATTAAATTCACAAAA  
Bur  
.....  
39880 39890 39900 39910 39920 39930 39940 39950  
39960  
.....  
Col  
TTTGTGTGAAACAAACTCTTCTATATTTCTATACAAGAGTTAACATATTTCTATATAAGTTATTGTAAAGATCAAAATATGAAATTA  
Bur  
.....  
39970 39980 39990 40000 40010 40020 40030 40040  
40050  
.....  
Col  
TGGTATAAAATGCATAGACACATATATACGTGCCCTATTAAAAGAGGCAGCCGAGAAGATAATATAGGAGGAAAGGAAGAGAAGAGATG  
Bur  
.....  
40060 40070 40080 40090 40100 40110 40120 40130  
40140  
.....  
Col  
GTGAAGAAGAGAGTTAAATGCAACTGCAAGAAGATAGTAACATAATCAGCACCGTCCATTTTGTGATCTAATTCCTTCTACTTGGCCGCA  
Bur  
.....  
40150 40160 40170 40180 40190 40200 40210 40220  
40230



.....  
41040            40960            40970            40980            40990            41000            41010            41020            41030  
.....  
Col  
AAGTTTTTTTATAAAATCTTTTTCTCTAAATATTTTTCTATGATTTTAATTAATCAATCAATCACAGTAACAACATTGCTTTTTCT  
Bur  
.....  
41130            41050            41060            41070            41080            41090            41100            41110            41120  
.....  
Col  
TGTTAAAGTCTGGTTTATCTGTAAAGTTAGCAGATGAGCTAATCAAGGGAGATATCTATAGCGACTTCATTCAAGTATAAAATCTTTCT  
Bur  
.....  
41220            41140            41150            41160            41170            41180            41190            41200            41210  
.....  
Col  
GTCTTTTTTAGGATTAATCCTCAGTAGTTACAAATTAATTAACATATATCTTTAATAACCCGTCAGGATCATCTTGCTCCTAGTGGTTA  
Bur  
.....  
41310            41230            41240            41250            41260            41270            41280            41290            41300  
.....  
Col  
TCTCAAAATTCCTACTGTATGTCTACTACCAAAATATATTTTGATGATAAAAAAATCTTCAAAATTTGAGATATCACAAAATCTTTGT  
Bur  
.....  
41400            41320            41330            41340            41350            41360            41370            41380            41390  
.....  
Col  
TTTTGATTTATCAGGATATGACAAAGTACTTGGGAAGCTCTAAGTATTTACCTAAGCTTAACAAATGAGATACCAGACCAAGAAACCAA  
Bur  
.....  
41490            41410            41420            41430            41440            41450            41460            41470            41480  
.....  
Col  
CTTACAAAGACCGTTTCACCAGTTTACATAACTTGGTTCTTATCAAGGTTTGGTCTCCTAAAAACCATCTAGACTTTTCAATTATCTTTT  
Bur  
.....  
41580            41500            41510            41520            41530            41540            41550            41560            41570  
.....  
Col  
GATTCCCTCTTTGATGATTCGGTTTTTGTTTGTTTACAGTTTCAGGGCGACAAGGTTATAGTTCCAAAAGATTCACTCTGGTTCTGGTT  
Bur  
.....  
41670            41590            41600            41610            41620            41630            41640            41650            41660  
.....  
Col  
TTATCCGGATGGTGAATTCGAACCTCTTCTCTCTGCTCAACAGACAAAGCTCTATACAGAGGATTGGATCGGCTGAAAACATTGGATGA  
Bur  
.....  
41760            41680            41690            41700            41710            41720            41730            41740            41750





# Supplementary Text S4: *AT5G47260* and *AT5G47280* sequences in corresponding CRISPR-edited lines in Bur-0 and HIF10499 backgrounds.

## *ΔAT5G47260* : CRISPR-edited lines for *AT5G47260*

### WT

ggcctccaatggagaagagaaccaaagagcgcaaggcagctgaaatatggcagctcttaaaggagaagagatttgggttggttactggatggcacaagagggaattg  
GlyLeuGlnTrpArgArgGluThrLysGluArgLysAlaAlaGluIleLeuAlaValLeuLysGluLysArgPheValLeuLeuLeuAspGlyIleGlnArgGluLeu  
gatcttgaggaaattggagttcctttccagcogagataatggatgcaaaattgtaccactcaatctctggaagcatgtgacgaagcaagtgggttgat  
AspLeuGluGluIleGlyValProPheProSerArgAspAsnGlyCysLysIleValPheThrThrGlnSerLeuGluAlaCysAspGluSerLysTrpValAsp

### in Bur-0 background

#### 117-1

tggagaagagaaaccaaagagcgcaaggcagctgaaatatggcagctcttaaaggagaagagatttgggttggttactggatggca---cagagggaattggatcttgaggaaattggagtcc  
TrpArgArgGluThrLysGluArgLysAlaAlaGluIleLeuAlaValLeuLysGluLysArgPheValLeuLeuLeuAspGlyT---hrGluGlyIleGlySer .

#### 117-36

tggagaagagaaaccaaagagcgcaaggcagctgaaaatattggcagctcttaaaggagaagagatttgggttggttactggatggca--cagagggaattggatcttgagg / 102nt / TAG  
TrpArgArgGluThrLysGluArgLysAlaAlaGluAsnIleGlySerLeuLysGlyGluGluIleCysValValThrGlyTrpHi---sArgGlyAsnTrpIleLeuArg

#### 85-7

tggagaagagaaaccaaagagcgcaaggcagctgaaatatggcagctcttaaaggagaagagatttgggttggttactggatggcaca-cagagggaattggatcttgaggaaattggagtt  
TrpArgArgGluThrLysGluArgLysAlaAlaGluIleLeuAlaValLeuLysGluLysArgPheValLeuLeuLeuAspGlyIleThrGluGlyIleGlySer .

### in HIF 10499 background

#### 95-14

gaaaccaaagagcgcaaggcagctgaaaatattggcagctcttaaaggagaagagatttgggttggttactggatggcaca-cagagggaattggatcttgagg / 102nt / TAG  
GluThrLysGluArgLysAlaAlaGluAsnIleGlySerLeuLysGlyGluGluIleCysValValThrGlyTrpHisIleArgGlyAsnTrpIleLeuArg

#### 98-7

tggagaagagaaaccaaagagcgcaaggcagctgaaatatggcagctcttaaaggagaagagatttgggttggttactggatggcaca-cagagggaattggatcttgaggaaattggagtccctt  
TrpArgArgGluThrLysGluArgLysAlaAlaGluIleLeuAlaValLeuLysGluLysArgPheValLeuLeuLeuAspGlyIleThrGluGlyIleGlySer .

#### 105-12

tggagaagagaaaccaaagagcgcaaggcagctgaaa-----aaaggagaagagatttgggttggttactggatggcaca-cagagggaattggatcttgaggaaattggagtccctt  
TrpArgArgGluThrLysGluArgLysAlaAlaGluL-----ysArgArgArgAspLeuCysCysTyrTrpMetAla .

## *ΔAt5g47280* : CRISPR-edited lines for *AT5G47280*

### WT

Ggtctacctttgtctctgaaagtcccttggcgcttcattaaacgatcgacctgaaacatattgggcaattggcagtgagaggttatcaagagtgaaacctgttgatgaaactcatgagagtaaaagt  
gtttgctcaaatcgaagca  
GlyLeuProLeuSerLeuLysValLeuGlyAlaSerLeuAsnAspArgProGluThrTyrTrpAlaIleAlaValGluArgLeuSerArgGlyGluProValAspGluThrHisGluSerLysVa  
lPheAlaGlnIleGluAla actctagaaaaatctcgatccaaaaaccaaagaggtttcttggatattgggtgctttccctgaaaggcaagaaa  
ThrLeuGluAsnLeuAspProLysThrLysGluCysPheLeuAspMetGlyAlaPheProGluGlyLysLys

### in Bur-0 background

#### 21-20

ggtctacctttgtctctgaaagtcccttggcgcttcattaaacgatcgacctgaaacatattgggcaattg-cagtgagaggttatcaagagtgaaacctgttgatgaaactcatgag  
GlyLeuProLeuSerLeuLysValLeuGlyAlaSerLeuAsnAspArgProGluThrTyrTrpAlaIleValSerGlyGluValIleLysArg .

#### 160-2

Ggtctacctttgtctctgaaagt**ccttgg**-----  
aacgatcgacctgaaacatattgggcaattgt**cagtgg**agaggttatcaagaggtgaacctgttgatgaaactcatgagagtaaagtgtttgctcaaatcgaagca  
GlyLeuProLeuSerLeuLysValLeuGly-----  
yThrIleAspLeuLysHisIleGlyGlnLeuSerValGluArgLeuSerArgGlyGluProValAspGluThrHisGluSerLysValPheAlaGlnIleGluAla

## 163-16

ggtctacctttgtctctgaaagt**ccttggcgcttcattaacgat**cgacctgaaacatattgggcaattg**cagtgg**agaggttatcaagaggtgaacctgttgatgaaactcatga  
GlyLeuProLeuSerLeuLysValLeuGlyAlaSerLeuAsnAspArgProGluThrTyrTrpAlaIleAspSerGlyGluValIleLysArg .

## in HIF 10499 background

## 170-4

ggtctacctttgtctctgaaagt**ccttgg**-**gcttcattaacgat**cgacctgaaacatattgggcaattg**cagtgg**agaggttatcaagaggtga  
GlyLeuProLeuSerLeuLysValLeuGlyLeuHis .

## 172-9

ggtctacctttgtctctgaaagt**ccttggcgcttcattaacgat**cgacctgaaacatattgggcaattg**cagtgg**agaggttatcaagaggtgaacctgttgatgaaactcat  
GlyLeuProLeuSerLeuLysValLeuGlyAlaSerLeuAsnAspArgProGluThrTyrTrpAlaIleAspSerGlyGluValIleLysArg .

## 176-15

ggtctacctttgtctctgaaagt**ccttgg**-----  
cgacctgaaacatattgggcaattg**cagtgg**agaggttatcaagaggtgaacctgttgatgaaactcatgagagtaaagtgtttgctcaaatcgaagcaactctag  
GlyLeuProLeuSerLeuLysValLeuGly-----  
yAspLeuLysHisIleGlyGlnLeuGlnTrpArgGlyTyrGlnGluValAsnLeuLeuMetLysLeuMetArgValLysCysLeuLeuLysSerLysGlnLeu

**Table S1: List of primers used for qPCR and CHOP qPCR**

| <b>Gene</b> | <b>Experimentation</b> | <b>LP primer (5' &gt; 3')</b> | <b>RP primer (5' &gt; 3')</b> |
|-------------|------------------------|-------------------------------|-------------------------------|
| At1g47550   | qPCR                   | CTCGCTCTTTCCGTCAAATC          | CCCCAGTGTGAAAAGTGCATC         |
| At1g54610   | qPCR                   | GGTCGGACAGAGGTAGAGCAG         | GTATGGTTCACGGGGTTTGT          |
| At5g38470   | qPCR                   | TGIACTCGGGTATCCCTGCT          | CTGGAGCTGCTGCTTGTTG           |
| At5g47260   | qPCR                   | AAGGTGGTCCAATCGGGAAC          | GATGGGGCAATCTGGIGTGA          |
| At5g47280   | qPCR                   | AGTCTCTGGCTTGAGAGGGT          | ATGGTCGAAGGTAGTTCCGC          |
| At5g47260   | CHOP qPCR              | TGCGTCGACCTATCGTTACA          | CCATGCCGTATCAAGCAAC           |
| At5g13440   | CHOP qPCR              | ACAAGCCAATTTTTGCTGAGC         | ACAACAGTCCGAGTGTGATGGT        |
| At5g47400   | CHOP qPCR              | GAAGCCGAAC TGCAAAC TGT        | ATGGTCCGGCTCTAGGAAAA          |

## Supplementary references

1. Alix, K., Lariagon, C., Delourme, R. & Manzanares-Dauleux, M. J. Exploiting natural genetic diversity and mutant resources of *Arabidopsis thaliana* to study the *A. thaliana*-*Plasmodiophora brassicae* interaction. *Plant Breed.* **126**, 218–221 (2007).
2. Simon, M. *et al.* Quantitative trait loci mapping in five new large recombinant inbred line populations of *Arabidopsis thaliana* genotyped with consensus single-nucleotide polymorphism markers. *Genetics* **178**, 2253–2264 (2008).
3. Jubault, M., Lariagon, C., Simon, M., Delourme, R. & Manzanares-Dauleux, M. J. Identification of quantitative trait loci controlling partial clubroot resistance in new mapping populations of *Arabidopsis thaliana*. *Theor. Appl. Genet.* **117**, 191–202 (2008).
4. Lemarié, S. *et al.* Both the Jasmonic Acid and the Salicylic Acid Pathways Contribute to Resistance to the Biotrophic Clubroot Agent *Plasmodiophora brassicae* in *Arabidopsis*. *Plant Cell Physiol.* **56**, 2158–2168 (2015).
5. Jubault, M. *et al.* Partial resistance to clubroot in *Arabidopsis* is based on changes in the host primary metabolism and targeted cell division and expansion capacity. *Funct. Integr. Genomics* **13**, 191–205 (2013).
6. Lemarié, S. *et al.* Camalexin contributes to the partial resistance of *Arabidopsis thaliana* to the biotrophic soilborne protist *Plasmodiophora brassicae*. *Front. Plant Sci.* **6**, 539 (2015).
7. Gravot, A. *et al.* Arginase induction represses gall development during clubroot infection in *Arabidopsis*. *Plant Cell Physiol.* **53**, 901–911 (2012).
8. Gravot Antoine *et al.* Genetic and physiological analysis of the relationship between partial resistance to clubroot and tolerance to trehalose in *Arabidopsis thaliana*. *New Phytol.* **191**, 1083–1094 (2011).
9. Brodmann, D. *et al.* Induction of trehalase in *Arabidopsis* plants infected with the trehalose-producing pathogen *Plasmodiophora brassicae*. *Mol. Plant. Microbe Interact.* **15**, 693–700 (2002).
